# Supplementary material for: Analysis of the coding genome of diffuse large B-cell lymphoma
Source: Springer Nature journal article supplement (doi:10.1038/ng.892), 2011-07-31
Supplement: 41588_2011_BFng892_MOESM14_ESM.pdf [file 41588_2011_BFng892_MOESM14_ESM.pdf]

## CORRECTION NOTICE

*Nat. Genet.* doi:10.1038/ng.892

### Analysis of the coding genome of diffuse large B-cell lymphoma

Laura Pasqualucci, Vladimir Trifonov, Giulia Fabbri, Jing Ma, Davide Rossi, Annalisa Chiarenza, Victoria A Wells, Adina Grunn, Monica Messina, Oliver Elliot, Joseph Chan, Govind Bhagat, Amy Chadburn, Gianluca Gaidano, Charles G Mullighan, Raul Rabadan & Riccardo Dalla-Favera

In the version of this supplementary file originally posted online, Supplementary Figures 2, 4 and 6 and Supplementary Tables 12, 14, 18 and 19 contained errors. The errors have been corrected in this file as of 19 August 2011.

Supplementary Information for

## **Analysis of the Coding Genome of Diffuse Large B-Cell Lymphoma**

Laura Pasqualucci<sup>1,2,3\*</sup>, Vladimir Trifonov<sup>4</sup>, Giulia Fabbri<sup>1</sup>, Jing Ma<sup>5</sup>, Davide Rossi<sup>6</sup>, Annalisa Chiarenza<sup>1</sup>, Victoria A. Wells<sup>1</sup>, Adina Grunn<sup>1</sup>, Monica Messina<sup>1</sup>, Oliver Elliot<sup>4</sup>, Joseph Chan<sup>4</sup>, Govind Bhagat<sup>2,3</sup>, Amy Chadburn<sup>7</sup>, Gianluca Gaidano<sup>6</sup>, Charles G. Mullighan<sup>5</sup>, Raul Rabadan<sup>4</sup>, and Riccardo Dalla-Favera<sup>1,2,3,8\*</sup>

<sup>1</sup>*Institute for Cancer Genetics*, <sup>2</sup>*Herbert Irving Comprehensive Cancer Center*, <sup>3</sup>*Department of Pathology & Cell Biology*, <sup>4</sup>*Department of Biomedical Informatics and Center for Computational Biology and Bioinformatics*, Columbia University, New York, NY 10032, USA.

<sup>5</sup>*Department of Pathology*, St Jude Children's Research Hospital, Memphis, TN 38105, USA.

<sup>6</sup>*Division of Hematology*, Department of Clinical and Experimental Medicine and IRCAD, Amedeo Avogadro University of Eastern Piedmont, Novara 28100, Italy.

<sup>7</sup>*Department of Pathology*, Northwestern University. Feinberg School of Medicine, Chicago, IL 60611, USA.

<sup>8</sup>*Department of Genetics & Development*, Columbia University, New York, NY 10032, USA.

\*To whom correspondence should be addressed. E-mail: [lp171@columbia.edu](mailto:lp171@columbia.edu); [rd10@columbia.edu](mailto:rd10@columbia.edu)

## **SUPPLEMENTARY NOTE**

**Cell lines.** The DLBCL cell lines used in the study have been described previously<sup>1</sup> and were all maintained in Iscove's Modified Dulbecco Medium (IMDM) supplemented with 10% FBS, 100 µg/mL penicillin, 100 µg/mL streptomycin and 2 mM L-glutamine, except for OCI-Ly10 and OCI-Ly4, which were cultured in IMDM with 20% heparinized human plasma and 55 µM β-mercaptoethanol. Supplementary Table 19 reports the results of the mutation analysis (and FISH analysis, where indicated) performed on commonly affected genes in 21 cell lines.

**Primary cases (Screening and Extension Panels).** The DLBCL Screening Panel comprised 48 cases (n=22 GCB-DLBCL, 24 ABC-DLBCL and 2 unclassified), which were analyzed for all 56 candidate genes shown in Figure 4, and was extended to 57 additional cases for selected genes found mutated at high frequency (total number, up to 105). The detailed phenotypic characterization of this large dataset has been described previously<sup>2</sup>. For the mutation analysis and SNP array analysis, high molecular weight genomic DNA was extracted from tumor and matched normal tissue (available for 8 cases) according to standard procedures. High quality copy number data were available for 73 of the 105 cases.

**Identification of focal minimal common regions (MCR) of aberration.** To facilitate the identification of copy number alterations that might have pathogenetic relevance, we first scanned through the curated segmented data across the affected samples to determine all consensus regions that are targeted by overlapping events of similar nature (gains and

losses, separately) in two or more samples. To determine MCRs of aberration, we then curated the list of consensus regions by visual inspection using the Integrative Genomics Viewer (IGV) software (<http://www.broadinstitute.org/igv>) to retain only the core consensus regions. In particular, we focused on *focal* MCRs of gain or loss, which were defined according to the following criteria: i) the consensus interval across all affected tumors is smaller than 1Mb and/or encompasses 1-3 genes; and ii) in at least one of the affected tumors, the segment of abnormal gene dosage encompasses 1-3 genes. These criteria exclude MCRs that contain  $\leq 3$  genes but derive from the overlap between large segments, as well as regions devoid of coding genes, which were not considered in the present study.

**Genomic Identification of Significant Targets in Cancer (GISTIC) analysis.** In order to identify relevant regions of copy number alteration, we applied the GISTIC method described by Beroukhi R. *et al.* (2007)<sup>3</sup> to the curated segmentation results. GISTIC identifies significantly amplified or deleted regions of the genome across a set of samples. Each aberration is assigned a G-score that considers the amplitude of the aberration as well as the frequency of its occurrence across samples. GISTIC then assesses the statistical significance of each aberration by comparing the observed G-scores to the results that would be expected by chance, using a permutation test that is based on the overall pattern of aberrations seen across the genome. The method accounts for multiple-hypothesis testing using the false-discovery rate (FDR) framework to assign a  $q$  value to each aberration. In this study, we used the default  $q$ -value cutoff of 0.25 (shown by the green vertical line in Supplementary Figure 2). For each significant region, a peak region was

identified, which is the part of the aberrant region with greatest amplitude and frequency of alteration and with minimal q-value. In addition, a wide peak was determined using a leave-one-out algorithm to allow for errors in the boundaries in a single sample (the wide peak boundaries are more robust for identifying the most likely gene targets in the region). Significant regions of loss and gain are listed in Supplementary Tables 7 and 8, respectively.

**Algorithm for detection of Common Focal genomic alterations (ComFocal).** As an additional tool to rank genes found affected by copy number alterations, we developed an algorithm that assigns a score to individual genes in the genome, based on the size of the aberration encompassing that gene, the amplitude of the aberration (copy number value), and the number of cases involved (V.T. and R.R., manuscript in preparation). Specifically, each aberrant region (in the curated segmentation data) is first assigned a score  $S_A$  that is equal to the inverse of its size  $L_A$  (i.e., the number of genes that are included in the region) weighted by the amplitude, defined as the deviation  $D_A$  from normal (diploid) copy number. The individual scores of each aberration encompassing a particular gene across different samples are then aggregated into a score  $S_G$  for that given gene:

$$S_G = \sum_A S_A = \sum_A D_A/L_A$$

This algorithm was applied to the set of curated segmentation data obtained after circular binary segmentation, as described in the SNP array analysis methods section.

**Functional annotation clustering of DLBCL target genes.** In order to determine whether genes affected by genetic lesions in DLBCL were enriched in specific functional

categories, the genes resulting from the WES analysis (n=93) and those included in focal MCRs of aberration encompassing 1-3 genes (n=480) were merged in a unique gene list, and functional annotation clustering analysis was performed using the DAVID software (<http://david.abcc.ncifcrf.gov>)<sup>4,5</sup> based on Gene Ontology terms. This tool groups terms with similar annotations in clusters, and subsequently ranks them by Enrichment Score; clusters were then selected by retaining only the ones including at least one significant ( $p < 0.05$ ) term. The DAVID software was also used to run a Functional Annotation chart analysis based on KEGG, BIOCARTE, PANTHER, REACTOME and BBID pathways. Moreover, the overlap between the gene list and the canonical pathways of the Molecular Signatures Database (MSigDB, Broad Institute) was calculated by the compute overlap tool of the GSEA software (<http://www.broadinstitute.org/gsea/msigdb/index.jsp>)<sup>6</sup>.

**Statistical analysis.** Statistical significance in the frequencies of nucleotide and dinucleotide targeting was assessed by the Poisson distribution [dinucleotide counts that are less or equal than expected (underrepresented) or more or equal than expected (overrepresented)]. After correcting for multiple hypotheses (Sidak), only CpG appears significantly (over) represented ( $p < 0.01$ ,  $p(\text{Sidak}) = 0.038$ ). Similar values were obtained by the Fisher's exact test.

## Validation of candidate somatic mutations identified by WES

Overall, 386 variants were predicted by the WES approach to be specifically associated with the tumor sample in the six patients analyzed. Of these, 96 (corresponding to 93 genes) were confirmed to be somatic in origin by Sanger sequencing of the corresponding paired tumor and normal genomic DNA, while 106 were also found in the matched normal DNA, thus representing non previously annotated germline polymorphisms that escaped detection by the high throughput sequencing analysis, possibly due to the relatively low mean depth of coverage (Supplementary Table 4). The remaining 184 variants were absent in both tumor and normal genomic DNA, when tested by Sanger sequencing (data not shown).

## Supplementary References

1. Pasqualucci, L. et al. Inactivating mutations of acetyltransferase genes in B-cell lymphoma. *Nature* **471**, 189-95 (2011).
2. Compagno, M. et al. Mutations of multiple genes cause deregulation of NF-kappaB in diffuse large B-cell lymphoma. *Nature* **459**, 717-21 (2009).
3. Beroukhi, R. et al. Assessing the significance of chromosomal aberrations in cancer: methodology and application to glioma. *Proc Natl Acad Sci U S A* **104**, 20007-12 (2007).
4. Huang da, W. et al. Extracting biological meaning from large gene lists with DAVID. *Curr Protoc Bioinformatics* **Chapter 13**, Unit 13 11 (2009).
5. Huang da, W., Sherman, B.T. & Lempicki, R.A. Systematic and integrative analysis of large gene lists using DAVID bioinformatics resources. *Nat Protoc* **4**, 44-57 (2009).
6. Subramanian, A. et al. Gene set enrichment analysis: a knowledge-based approach for interpreting genome-wide expression profiles. *Proc Natl Acad Sci U S A* **102**, 15545-50 (2005).

# Supplementary Figure 1

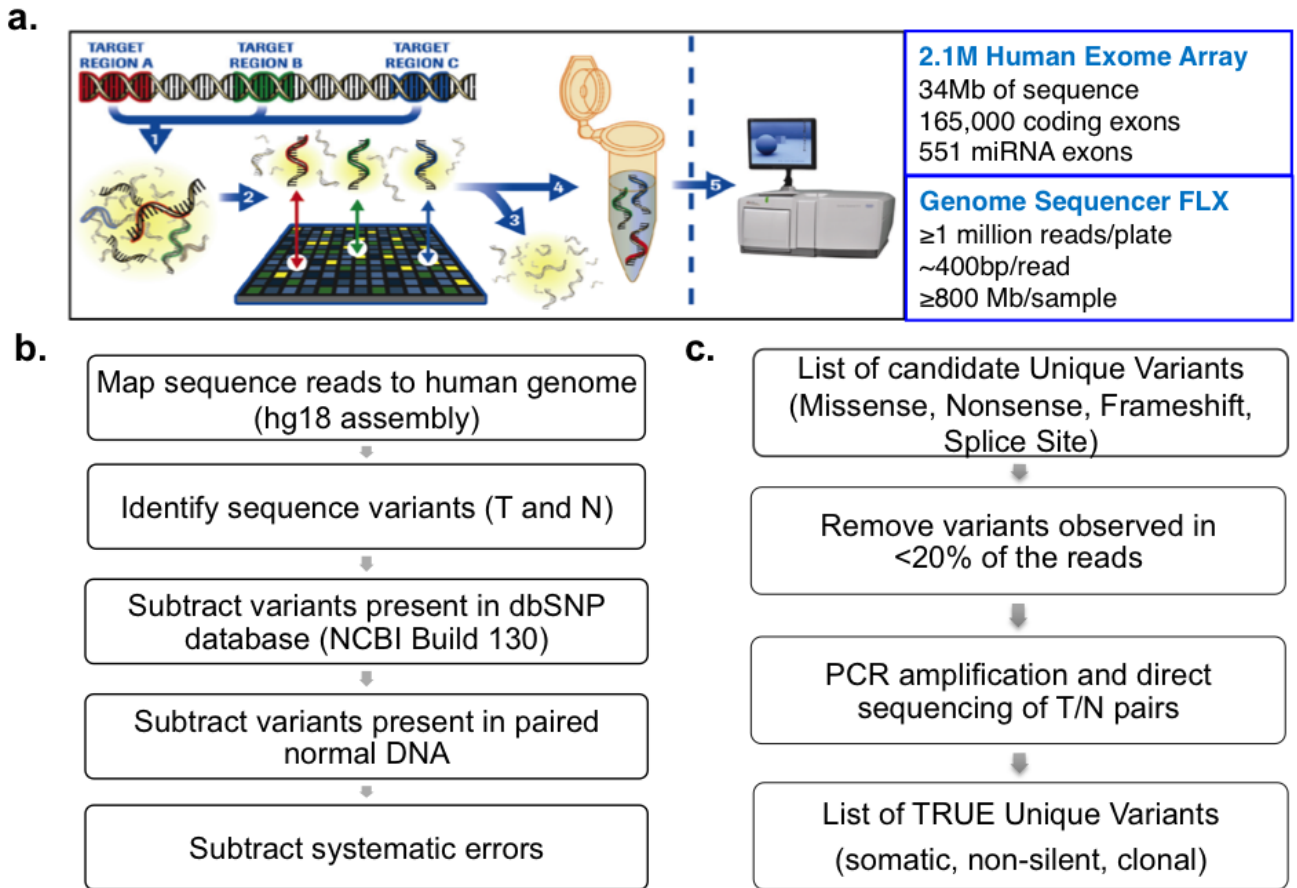

**Supplementary Figure 1. Whole Exome Sequencing approach.** **a**, Schematics of the sequence capture protocol used for enrichment of non-repetitive coding regions and ultra-high-throughput sequencing of 6 DLBCL patients (matched tumor-normal DNAs). The technical features of the NimbleGen 2.1M capture array and the expected performance of the 454 GS FLX sequencer are indicated. **b**, Computational pipeline adopted for the identification of tumor-specific, non-silent sequence variants after mapping to the human genome assembly hg18 (NCBI Build 36). **c**, Final validation procedure of candidate sequence variants.



# Supplementary Figure 2

## copy number losses

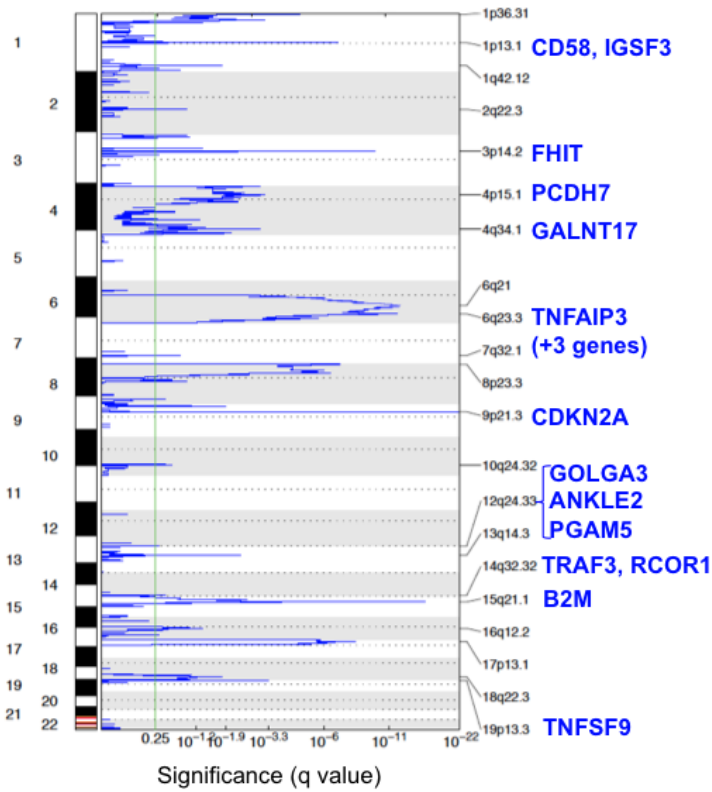

## copy number gains

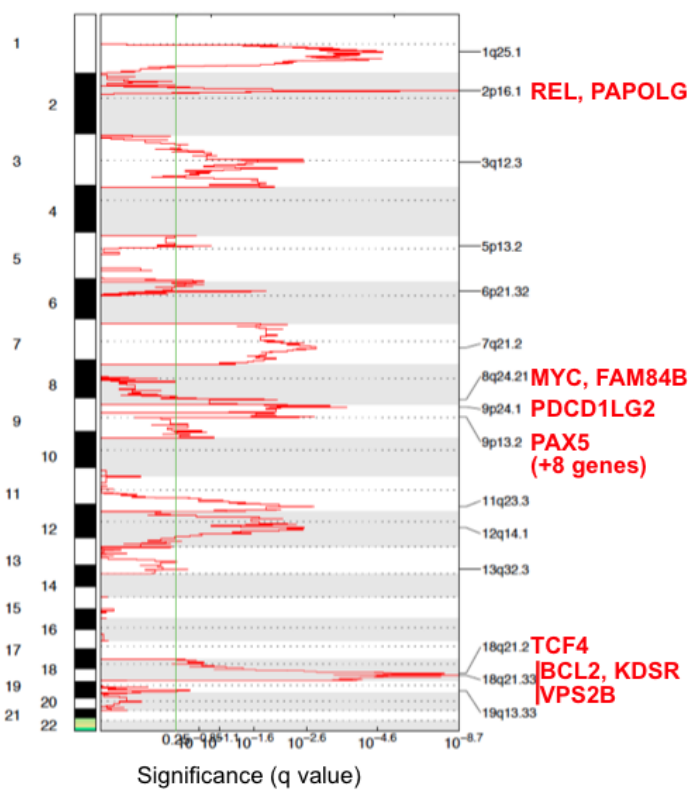

**Supplementary Figure 2. Significant regions of copy number alterations in the DLBCL genome.** Statistical analysis of copy number gains (red) and copy number losses (blue) in 79 DLBCL cases according to GISTIC analysis. False discovery rates for each aberration (q values, X axis) are plotted at each genomic position across the 22 chromosomes (Y axis). The green line represents the q value cutoff for significance (0.25). Centromere positions in each chromosome are indicated by dotted lines, and the location of the significant peak regions (21 deletions and 15 gains) is indicated to the right of each panel; gene names are provided only for focal aberrations encompassing  $\leq 3$  genes, unless indicated.

# Supplementary Figure 3

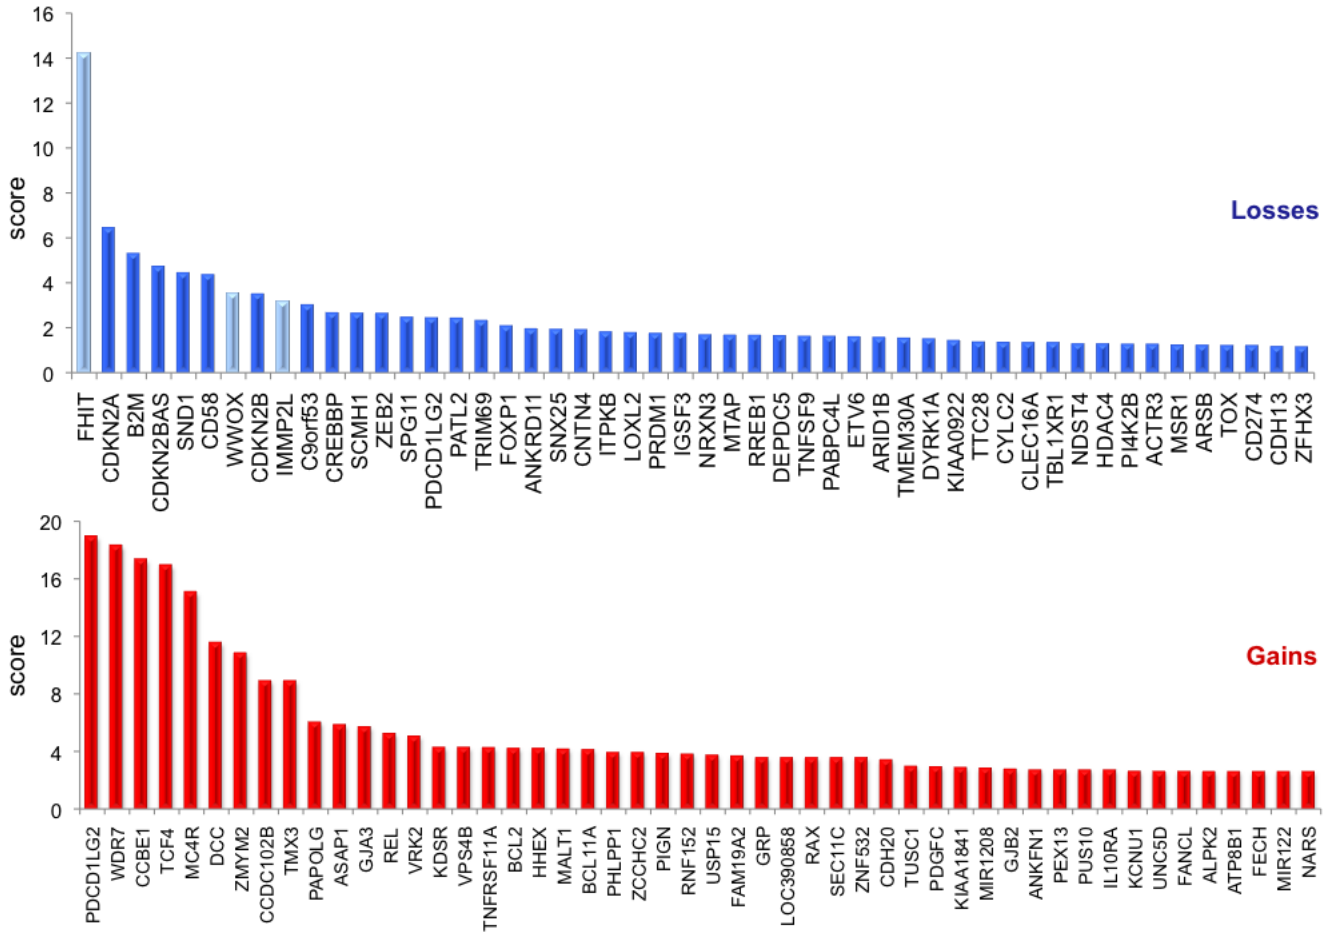

**Supplementary Figure 3. Top 50 genes affected by copy number losses (top) and gains (bottom) in DLBCL, based on the ComFocal algorithm.** Genes are ranked from highest to lowest, according to their significance score (see Supplementary Notes). Light blue denotes common fragile sites. Note that gains/amplifications encompassing only a subset of gene exons were also considered in this analysis, although the functional consequences of these lesions are less clear.

# Supplementary Figure 4

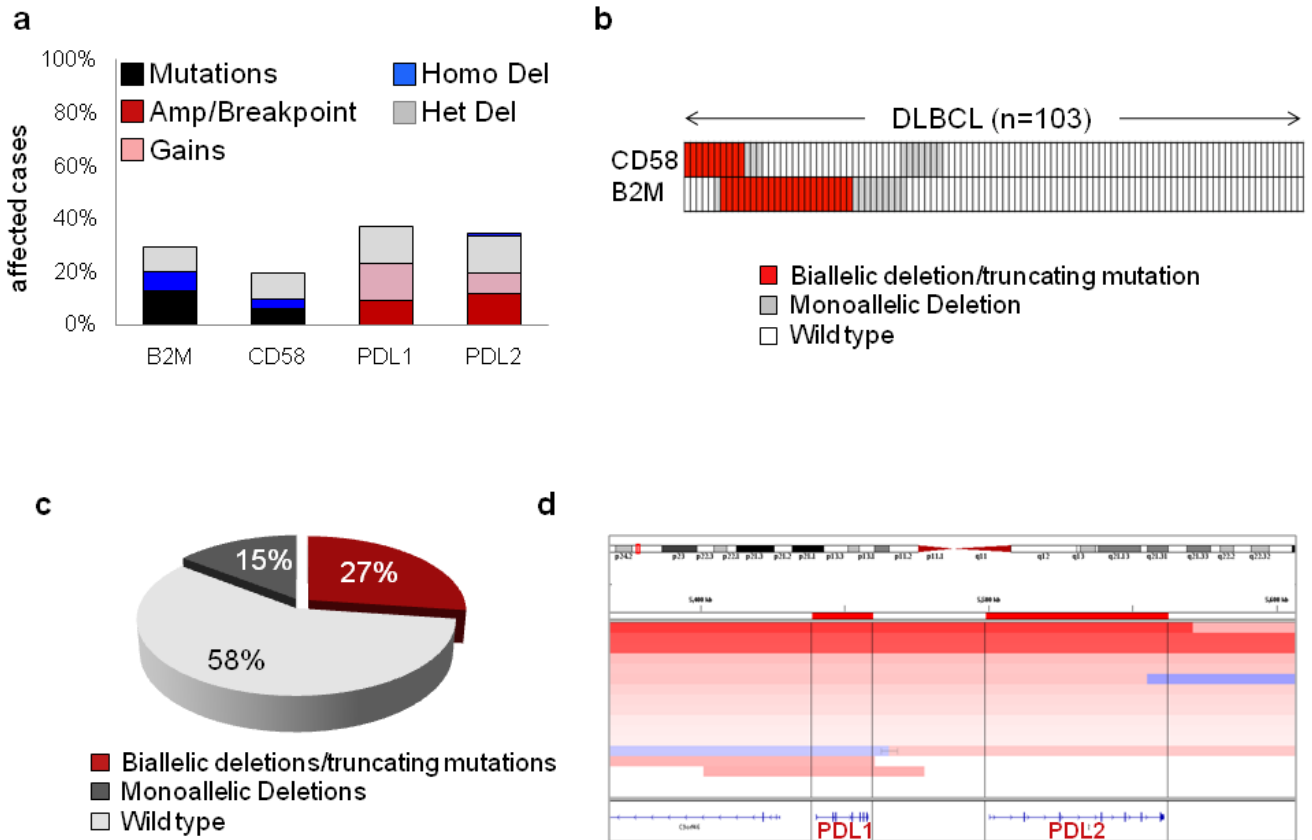

**Supplementary Figure 4. Genetic lesions of immunomodulatory genes in DLBCL.** **a**, Frequency of genomic aberrations at four genes involved in T cell-B cell recognition. **b**, Relationship between inactivating mutations of *B2M* and *CD58*. Each column in the heatmap represents a patient, and the status of the two genomic loci is indicated by the color. **c**, Overall proportion of DLBCL patients harboring genetic lesions in *CD58* and *B2M*. **d**, Graphic display of copy number data from 15 patients harboring amplifications and rearrangements involving the *PDL1* and *PDL2* loci. Segmentation data were visualized using the IGV tool, where each track represents one sample, white denotes a normal (diploid) copy number, red indicates a region of copy number gain and blue indicates a region of copy number loss. Note that, due to the presence of non-tumor cells infiltrating the biopsy, the inferred copy number, and the corresponding color intensity, may vary across samples. Individual genes in the region are aligned in the bottom panel, and the boxed areas (defined by the red bars at the top) highlight the two *PDL* genes.

# Supplementary Figure 5

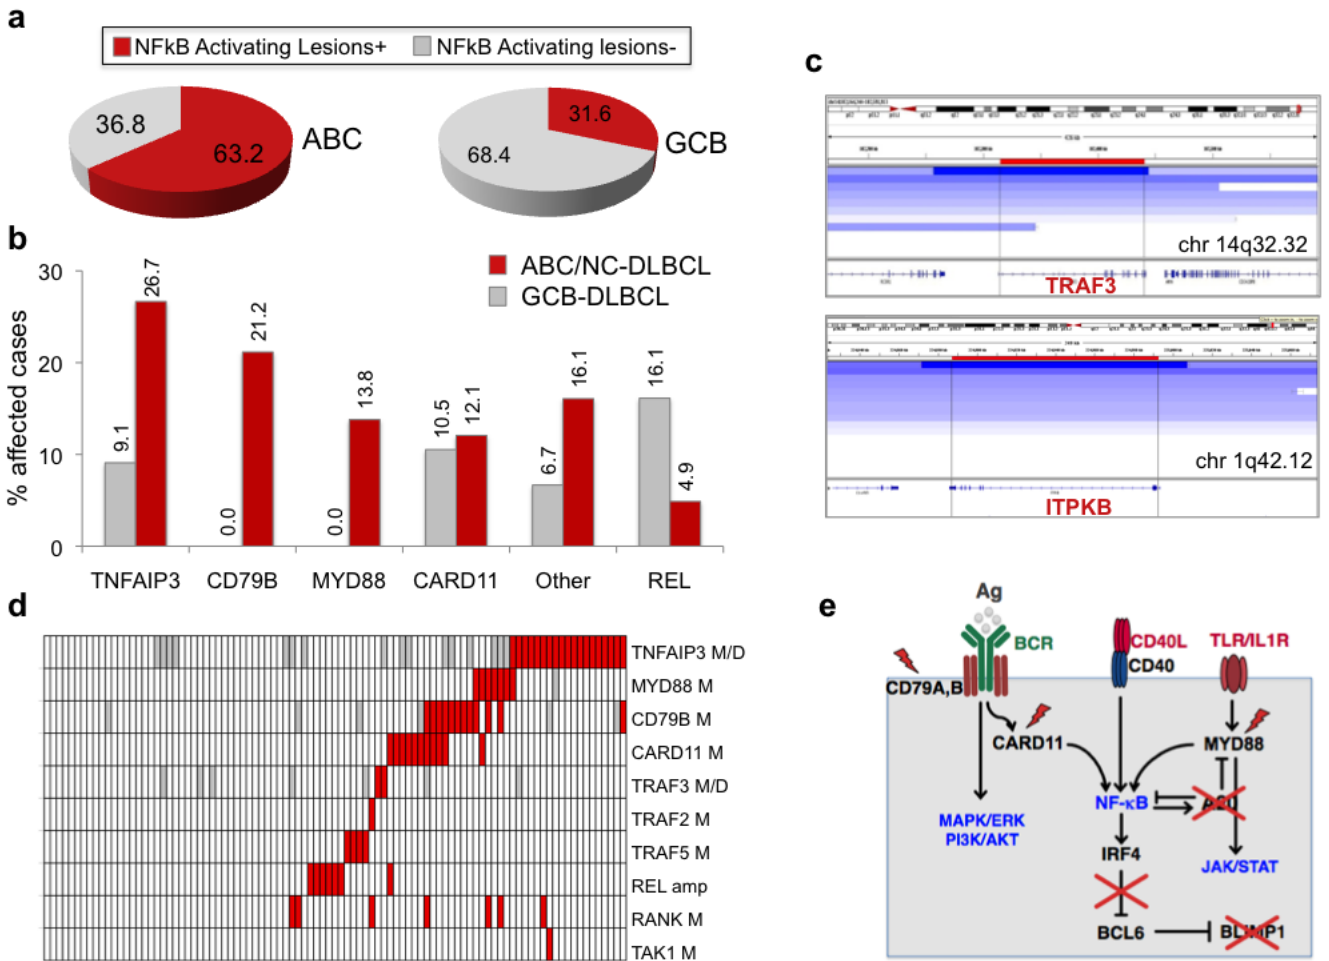

**Supplementary Figure 5. DLBCL-associated genetic lesions leading to activation of NF- $\kappa$ B.** **a**, Overall prevalence of cases carrying structural alterations that converge on the activation of the NF- $\kappa$ B signaling pathway (mutation and copy number data, combined). **b**, Frequency of genetic lesions affecting components of the NF- $\kappa$ B, BCR and TLR pathway in major DLBCL phenotypic subtypes. The following genes are included in the category designated as “other”: *TRAF2*, *TRAF3*, *TRAF5*, *TAK1* and *TNFRSF11A* (also known as *RANK*). For *REL*, only high copy number amplifications are scored. **c**, Inferred log<sub>2</sub> copy number data from DLBCL primary cases carrying loss of *TRAF3* (upper panel) and *ITPKB* (lower panel), shown using the IGV visualization tool. Each track represents a patient. Blue lines indicate the extent of the deletions identified in the DLBCL samples, with the darker blue segment corresponding to a homozygous loss. **d**, Relative distribution of genetic lesions affecting the indicated genes in individual DLBCLs (primary cases only). Each column represents one patient, with color codes indicating the presence or absence of the corresponding feature, as follows: red, structural alteration; white, wild type; light grey, monoallelic deletions (*TNFAIP3* and *TRAF3*) or missense mutations whose functional significance is unknown (*CD79B* and *MYD88*). Only samples with complete information about the indicated lesions are considered in the plot. **e**, Schematics of the NF- $\kappa$ B-IRF4-BCL6-PRDM1 pathway; only some of the upstream activating signals are shown in the figure. Most common targets of genetic alterations are indicated.

# Supplementary Figure 6

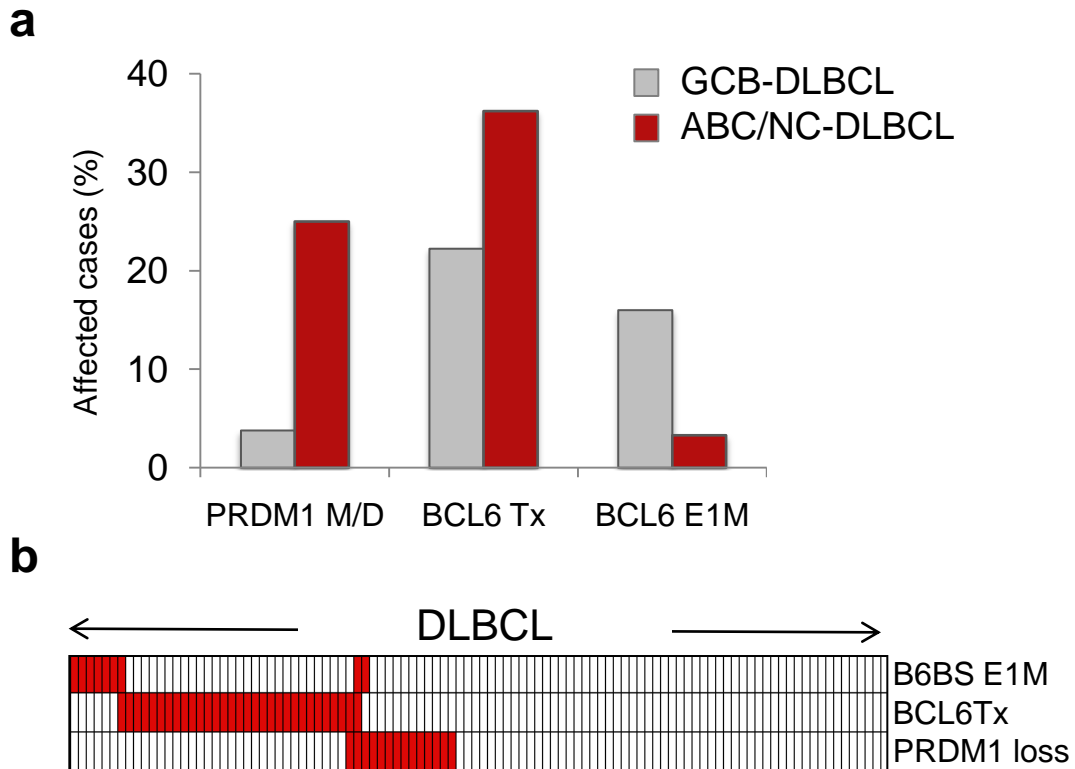

**Supplementary Figure 6.** Mutually exclusive genetic alterations of *BCL6* and *PRDM1*. **a**, Frequency of *PRDM1* biallelic loss (mutations and/or deletions), *BCL6* translocations (Tx), and mutations affecting two *BCL6* binding sites within the gene noncoding exon 1 in two major phenotypic subtypes of DLBCL (primary biopsies only). **b**, Relative distribution of the indicated lesions in individual DLBCL cases. Only samples with complete information about the three types of lesion are considered in the plot.

**Supplementary Table 1. Features of the 6 DLBCL discovery cases analyzed by Whole Exome Sequencing**

| Variable               | Patient ID  |             |             |             |             |             |
|------------------------|-------------|-------------|-------------|-------------|-------------|-------------|
|                        | 2112        | 2203        | 2204        | 2205        | 2209        | 2210        |
| DLBCL subtype          | NC          | ABC         | ABC         | ABC         | non-GCB     | GCB         |
| Age                    | 55          | 62          | 43          | 42          | 79          | 73          |
| Sex                    | F           | F           | M           | F           | F           | M           |
| Tumor site             | lymph node  | lymph node  | lymph node  | lymph node  | spleen      | lymph node  |
| IgHV                   | IGHV3-66*01 | IGHV3-30*03 | IGHV4-34*01 | IGHV1-18*01 | IGHV4-34*02 | IGHV4-34*01 |
| IgHD                   | IGHD3-3*01  | IGHD3-9*01  | IGHD3-3*01  | IGHD1-26*01 | IGHD5-12*01 | IGHD6-6*01  |
| IgHJ                   | IGHJ4*02    | IGHJ6*02    | IGHJ4*02    | IGHJ6*02    | IGHJ6*02    | IGHJ5*02    |
| % Homology             | 89.12       | 87.61       | 92.28       | 83.33       | 86.67       | 96.12       |
| MYC Translocation      | nd          | Neg         | Neg         | Neg         | Neg         | Neg         |
| BCL2-IGH Translocation | nd          | Neg         | Neg         | Neg         | Neg         | Neg         |
| BCL6 Translocation     | Neg         | Neg         | Pos         | Neg         | Pos         | Neg         |
| 6q21 deletion          | Neg         | Neg         | Pos         | Neg         | Neg         | Pos         |
| TP53 deletion          | Neg         | Neg         | Pos         | Neg         | Neg         | Neg         |

NC, unclassified; ABC, activated B cell-like; GCB, germinal center B cell-like

**Supplementary Table 2. Results of Titanium 454 sequencing and mapping after whole exome capture**

| Sample ID | Target Region Coverage (%) |      |      | Mean Depth^^ | N of mapped reads (%) | Unique reads in region (%) | N of variant reads (HC) |       |        |
|-----------|----------------------------|------|------|--------------|-----------------------|----------------------------|-------------------------|-------|--------|
|           | 1X                         | ≥5X  | HCC^ |              |                       |                            | Total                   | Known | Novel* |
| 2112N     | 95.8                       | 76.8 | 70.2 | 10.0         | 2465148 (99.12%)      | 1655515 (70.4%)            | 10758                   | 10161 | 597    |
| 2112T     | 96.1                       | 78.6 | 71.1 | 9.5          | 2502590 (99.10%)      | 1706903 (71.6%)            | 10902                   | 10193 | 709    |
| 2203N     | 96.0                       | 77.2 | 69.7 | 9.0          | 2274722 (98.91%)      | 2038393 (88.6%)            | 9730                    | 9116  | 614    |
| 2203T     | 95.4                       | 75.5 | 68.3 | 8.9          | 2192985 (98.78%)      | 1981190 (89.2%)            | 9423                    | 8683  | 740    |
| 2204N     | 95.7                       | 79.4 | 72.7 | 10.0         | 2489172 (99.01%)      | 2282059 (90.8%)            | 9859                    | 9141  | 718    |
| 2204T     | 96.0                       | 79.4 | 74.3 | 12.8         | 4219862 (98.72%)      | 3332313 (77.9%)            | 10247                   | 9354  | 893    |
| 2205N     | 96.5                       | 81.4 | 74.3 | 9.7          | 2341274 (98.98%)      | 1658253 (74.3%)            | 11478                   | 10663 | 815    |
| 2205T     | 96.3                       | 79.2 | 72.1 | 9.4          | 2297582 (98.98%)      | 1619798 (74.1%)            | 11349                   | 10585 | 764    |
| 2209N     | 96.2                       | 79.4 | 72.3 | 9.4          | 2479111 (99.19%)      | 1721161 (72.3%)            | 10626                   | 10012 | 614    |
| 2209T     | 94.7                       | 70.8 | 64.7 | 9.0          | 2344386 (99.27%)      | 1593773 (70.9%)            | 8997                    | 8464  | 533    |
| 2210N     | 96.3                       | 78.9 | 72.1 | 9.6          | 2376481 (99.07%)      | 1722250 (75.4%)            | 10741                   | 10064 | 677    |
| 2210T     | 95.6                       | 75.7 | 70.1 | 10.2         | 2388566 (98.84%)      | 1739238 (75.8%)            | 10570                   | 9881  | 689    |

^ High Confidence Coverage, i.e. % of the target region where coverage depth was estimated to be sufficient for detecting both alleles of heterozygous variants. This value can be taken as an estimate of the mutation-detection sensitivity (see methods)

^^ Mean number of sequence reads covering the target exome

\* Number of variant reads (High Confidence) not reported in the NCBI dbSNP database, before cross-comparison with paired normal

Supplementary Table 3. Validated somatic mutations identified by whole exome sequencing in the DLBCL discovery panel

| Sample ID | Gene     | Exon# | Chr | Start^    | End^      | Ref nt           | Var nt % | CovT | CovN | Mutation Type | AA change      | SIFT prediction | Polyphen prediction       | COSMIC database^^ | CGC database** | CCDS ID     |             |
|-----------|----------|-------|-----|-----------|-----------|------------------|----------|------|------|---------------|----------------|-----------------|---------------------------|-------------------|----------------|-------------|-------------|
| 2112      | ADCK1    | 10    | 14  | 77469480  | 77469480  | C                | T        | 23   | 13   | -             | Missense       | P522L           | Damaging (low confidence) | Probably damaging | No             | CCDS9869.1  |             |
| 2112      | BRSK1    | 10    | 19  | 60506038  | 60506038  | G                | A        | 50   | 8    | -             | Missense       | R340H           | Tolerated                 | Unknown           | Yes (4)        | CCDS12921.1 |             |
| 2112      | GCFC1    | 8     | 21  | 33049459  | 33049459  | C                | T        | 33   | 10   | -             | Missense       | R487Q           | Damaging                  | Probably damaging | No             | CCDS33541.1 |             |
| 2112      | CARD11   | 4     | 7   | 2950673   | 2950673   | G                | A        | 50   | 6    | 8             | Missense       | T128M           | Damaging                  | Probably damaging | Yes (3)        | CCDS5336.2  |             |
| 2112      | CD79B    | 4     | 17  | 59360531  | 59360531  | A                | T        | 82   | 11   | -             | Missense       | Y196N           | Damaging                  | Probably damaging | No             | CCDS11655.1 |             |
| 2112      | CPNE7    | 16    | 16  | 88189480  | 88189480  | G                | A        | 44   | 9    | -             | Missense       | V578I           | Damaging                  | Probably damaging | No             | CCDS10980.1 |             |
| 2112      | SPECC1   | 1     | 17  | 19940675  | 19940675  | C                | G        | 57   | 8    | -             | Missense       | S40C            | Damaging (low confidence) | Probably damaging | No             | CCDS32590.1 |             |
| 2112      | DENND3   | 9     | 8   | 142242636 | 142242636 | T                | G        | 25   | 12   | 8             | Missense       | Y379D           | Tolerated                 | Probably damaging | No             | CCDS34947.1 |             |
| 2112      | DUSP27   | 5     | 1   | 165363521 | 165363521 | G                | A        | 60   | 10   | 17            | Missense       | M843I           | Tolerated                 | Benign            | No             | CCDS30932.1 |             |
| 2112      | GIMAP5   | 2     | 7   | 150070209 | 150070209 | T                | C        | 43   | 9    | 5             | Missense       | S17P            | Tolerated                 | Benign            | Yes (1)        | CCDS5907.1  |             |
| 2112      | IGSF5    | 5     | 21  | 40073073  | 40073073  | G                | A        | 56   | 10   | -             | Missense       | R302H           | Damaging (low confidence) | Probably damaging | No             | CCDS33562.1 |             |
| 2112      | OFD1     | 16    | X   | 13688504  | 13688504  | G                | T        | 62   | 13   | -             | Missense       | K668N           | Damaging (low confidence) | Possibly damaging | No             | CCDS14157.1 |             |
| 2112      | PDCD4    | 10    | 10  | 112645760 | 112645760 | T                | A        | 30   | 10   | -             | Missense       | V425E           | Damaging                  | Benign            | Yes (2)        | CCDS7567.1  |             |
| 2112      | PPP2R5A  | 1     | 1   | 210526077 | 210526077 | T                | A        | 50   | 6    | 8             | Missense       | M1K             | Damaging (low confidence) | Possibly damaging | Yes (1)        | CCDS1503.1  |             |
| 2112      | PRDM1    | 1     | 6   | 106643019 | 106643019 | T                | G        | 73   | 11   | 8             | Splice site    | E97fs           | Damaging                  | Damaging          | Yes (1)        | Yes         | CCDS5054.1  |
| 2112      | PRX      | 4     | 19  | 45594857  | 45594857  | C                | G        | 35   | 17   | -             | Missense       | K414N           | Tolerated                 | Probably damaging | Yes (2)        | No          | CCDS33028.1 |
| 2112      | SCNN1A   | 1     | 12  | 6353892   | 6353892   | C                | T        | 55   | 11   | -             | Missense       | G107R           | Tolerated                 | Benign            | No             | No          | CCDS8543.1  |
| 2112      | SDCCAG1  | 17    | 14  | 49351269  | 49351269  | C                | T        | 31   | 16   | -             | Missense       | R545Q           | Damaging                  | Probably damaging | No             | No          | CCDS9694.1  |
| 2112      | SERPINA6 | 1     | 14  | 93850239  | 93850239  | C                | T        | 58   | 12   | -             | Missense       | S167N           | Tolerated                 | Possibly damaging | Yes (3)        | No          | CCDS9924.1  |
| 2112      | STOML2   | 2     | 9   | 35092777  | 35092777  | G                | C        | 30   | 11   | 11            | Missense       | S30C            | Damaging (low confidence) | Probably damaging | No             | No          | CCDS6577.1  |
| 2112      | STRADA   | 2     | 17  | 59157777  | 59157777  | G                | A        | 68   | 19   | -             | Missense       | S16L            | Damaging (low confidence) | Possibly damaging | Yes (1)        | No          | CCDS32703.1 |
| 2112      | UBE2A    | 2     | X   | 118592926 | 118592926 | G                | C        | 30   | 10   | -             | Missense       | A27P            | Damaging                  | Possibly damaging | No             | No          | CCDS14581.1 |
| 2112      | WDR88    | 4     | 19  | 38330426  | 38330426  | C                | G        | 80   | 11   | -             | Missense       | A171G           | Damaging                  | Probably damaging | Yes (3)        | No          | CCDS12429.1 |
| 2203      | ADAMTSL3 | 15    | 15  | 82373042  | 82373042  | G                | A        | 67   | 7    | 15            | Missense       | R632Q           | Tolerated                 | Benign            | Yes (18)       | No          | CCDS10326.1 |
| 2203      | ARHGEF2  | 17    | 1   | 154188192 | 154188192 | C                | G        | 62   | 10   | 12            | Splice site    | D725fs          | Damaging                  | Damaging          | Yes (1)        | No          | CCDS1125.1  |
| 2203      | BCL2L10  | 1     | 15  | 50191929  | 50191929  | C                | T        | 45   | 13   | 2             | Missense       | R96K            | Tolerated                 | Benign            | No             | No          | CCDS10148.1 |
| 2203      | C12orf35 | 1     | 12  | 32028772  | 32028772  | C                | T        | 46   | 17   | 8             | Nonsense       | Q1206*          | Damaging                  | Damaging          | Yes (1)        | No          | CCDS8725.2  |
| 2203      | CAMTA1   | 9     | 1   | 7646677   | 7646677   | G                | A        | 67   | 7    | 5             | Missense       | G495S           | Damaging (low confidence) | Probably damaging | Yes (9)        | No          | CCDS30576.1 |
| 2203      | CD36     | 4     | 7   | 80130402  | 80130402  | C                | A        | 42   | 14   | 9             | Missense       | T197K           | Tolerated                 | Benign            | Yes (1)        | No          | CCDS34673.1 |
| 2203      | CD74     | 2     | 5   | 149766917 | 149766917 | G                | A        | 86   | 7    | 12            | Missense       | L97F            | Damaging                  | Probably damaging | Yes (1)        | Yes         | CCDS34276.1 |
| 2203      | CDC42EP1 | 2     | 22  | 36294321  | 36294321  | G                | A        | 30   | 10   | 9             | Missense       | A242T           | Damaging (low confidence) | Unknown           | No             | No          | CCDS13949.1 |
| 2203      | CXorf48  | 2     | X   | 134131250 | 134131250 | T                | G        | 27   | 11   | -             | Missense       | K71N            | Tolerated                 | Possibly damaging | No             | No          | CCDS14647.1 |
| 2203      | ETF1     | 9     | 5   | 137872286 | 137872286 | T                | G        | 37   | 8    | 16            | Missense       | Q401P           | Damaging                  | Possibly damaging | Yes (2)        | No          | CCDS4207.1  |
| 2203      | FBXO31   | 8     | 16  | 85925216  | 85925216  | G                | A        | 43   | 8    | 2             | Missense       | R392C           | Damaging (low confidence) | Benign            | Yes (1)        | No          | CCDS32501.1 |
| 2203      | GPR112   | 3     | X   | 135256002 | 135256002 | C                | G        | 62   | 21   | -             | Missense       | T824S           | Damaging (low confidence) | Benign            | Yes (11)       | No          | CCDS35409.1 |
| 2203      | HLA-DMB  | 3     | 6   | 33012974  | 33012979  | CAGGTG           | -        | 43   | 7    | 17            | Frameshift del | C192fs          | Damaging                  | Damaging          | No             | No          | CCDS4760.1  |
| 2203      | HNF1B    | 2     | 17  | 33173723  | 33173723  | G                | T        | 44   | 10   | 3             | Missense       | A122D           | Damaging                  | Probably damaging | Yes (3)        | No          | CCDS11324.1 |
| 2203      | LRP1B    | 4     | 2   | 141728635 | 141728635 | G                | A        | 100  | 3    | 10            | Missense       | T130I           | Tolerated                 | Benign            | Yes (34)       | No          | CCDS2182.1  |
| 2203      | MDN1     | 69    | 6   | 90453413  | 90453413  | G                | A        | 36   | 13   | 15            | Missense       | S3834F          | Damaging                  | Probably damaging | Yes (8)        | No          | CCDS5024.1  |
| 2203      | MEGF10   | 8     | 5   | 126774052 | 126774052 | -                | AGG      | 43   | 9    | 16            | In frame ins   | G330+           | Damaging                  | Damaging          | Yes (4)        | No          | CCDS4142.1  |
| 2203      | MTMR8    | 9     | X   | 63473881  | 63473881  | C                | A        | 27   | 11   | -             | Nonsense       | G365*           | Damaging                  | Damaging          | Yes (4)        | No          | CCDS14379.1 |
| 2203      | MYOM2    | 1     | 8   | 1986364   | 1986364   | G                | A        | 29   | 17   | 8             | Missense       | R26Q            | Tolerated                 | Probably damaging | Yes (5)        | No          | CCDS5957.1  |
| 2203      | PDE6A    | 2     | 5   | 149294380 | 149294380 | G                | A        | 37   | 8    | 13            | Missense       | A190V           | Damaging                  | Probably damaging | Yes (2)        | No          | CCDS4299.1  |
| 2203      | RASGEF1A | 5     | 10  | 43015668  | 43015668  | C                | T        | 50   | 8    | 21            | Missense       | V242I           | Tolerated                 | Benign            | No             | No          | CCDS7202.2  |
| 2203      | RYR1     | 82    | 19  | 43718491  | 43718506  | ATGCCCTTGAGAGACA | -        | 54   | 15   | 8             | Frameshift del | N3844fs         | Damaging                  | Damaging          | Yes (10)       | No          | CCDS33011.1 |
| 2203      | SERPINA1 | 1     | 14  | 93918765  | 93918765  | C                | T        | 45   | 12   | 10            | Missense       | G188D           | Tolerated                 | Benign            | Yes (1)        | No          | CCDS9925.1  |
| 2203      | TSC22D1  | 1     | 13  | 44045498  | 44045498  | C                | T        | 33   | 16   | 16            | Missense       | A905T           | Damaging (low confidence) | Possibly damaging | No             | No          | CCDS31966.1 |
| 2203      | TSPAN7   | 4     | X   | 38418509  | 38418509  | C                | T        | 46   | 13   | -             | Missense       | R146C           | Damaging                  | Possibly damaging | Yes (1)        | No          | CCDS14248.1 |
| 2203      | ZFH3     | 8     | 16  | 71386682  | 71386682  | G                | A        | 40   | 11   | 10            | Missense       | P2467L          | Not scored                | Unknown           | Yes (2)        | No          | CCDS10908.1 |
| 2203      | ZNF311   | 5     | 6   | 29074501  | 29074501  | C                | A        | 67   | 6    | 4             | Missense       | C135F           | Damaging                  | Probably damaging | No             | No          | CCDS34357.1 |
| 2203      | ZNF521   | 3     | 18  | 21059298  | 21059298  | A                | G        | 31   | 20   | 10            | Missense       | L861S           | Tolerated                 | Benign            | Yes (7)        | Yes         | CCDS32806.1 |
| 2203      | ZWILCH   | 1     | 15  | 64584741  | 64584741  | A                | A        | 44   | 9    | 4             | Missense       | R4Q             | Damaging (low confidence) | Benign            | Yes (1)        | No          | CCDS10219.1 |
| 2204      | NCEH1    | 2     | 3   | 173848463 | 173848463 | C                | T        | 42   | 16   | 14            | Missense       | V124I           | Tolerated                 | Benign            | No             | No          | CCDS33893.1 |
| 2204      | ABCC9    | 36    | 12  | 21851680  | 21851680  | T                | C        | 38   | 16   | 14            | Missense       | D1439G          | Damaging                  | Benign            | Yes (4)        | No          | CCDS8693.1  |
| 2204      | DPF2     | 10    | 11  | 64872979  | 64872979  | G                | T        | 36   | 14   | 11            | Splice site    | G381fs          | Damaging                  | Damaging          | Yes (1)        | No          | CCDS8100.1  |
| 2204      | MYD88    | 5     | 3   | 38157645  | 38157645  | T                | C        | 20   | 17   | 4             | Missense       | L265P           | Not scored                | Probably damaging | Yes (93)       | Yes         | CCDS2674.2  |



|      |         |    |    |           |           |       |   |    |    |    |                |         |                           |                   |           |     |             |
|------|---------|----|----|-----------|-----------|-------|---|----|----|----|----------------|---------|---------------------------|-------------------|-----------|-----|-------------|
| 2204 | OR8H3   | 1  | 11 | 55646778  | 55646778  | G     | A | 27 | 50 | 22 | Missense       | M118I   | Damaging                  | Probably damaging | Yes (2)   | No  | CCDS31519.1 |
| 2205 | AFF2    | 11 | X  | 147845734 | 147845734 | A     | G | 67 | 7  | 12 | Missense       | H820R   | Tolerated                 | Benign            | Yes (5)   | No  | CCDS14684.1 |
| 2205 | DCHS1   | 2  | 11 | 6611935   | 6611935   | G     | A | 43 | 14 | 10 | Missense       | A659V   | Damaging                  | Probably damaging | Yes (3)   | No  | CCDS7771.1  |
| 2205 | DHX15   | 4  | 4  | 24167097  | 24167097  | T     | C | 25 | 12 | 10 | Missense       | M246V   | Damaging                  | Probably damaging | Yes (1)   | No  | CCDS33966.1 |
| 2205 | DPYD    | 19 | 1  | 97473123  | 97473123  | G     | A | 33 | 12 | 4  | Missense       | F772L   | Damaging                  | Probably damaging | Yes (5)   | No  | CCDS30777.1 |
| 2205 | DPYD    | 6  | 1  | 97937522  | 97937522  | T     | G | 33 | 9  | 4  | Missense       | E218A   | Damaging                  | Probably damaging | Yes (5)   | No  | CCDS30777.1 |
| 2205 | DSC3    | 11 | 18 | 26842010  | 26842010  | A     | G | 37 | 8  | 4  | Missense       | Y545H   | Tolerated                 | Possibly damaging | Yes (2)   | No  | CCDS32810.1 |
| 2205 | DUSP9   | 3  | X  | 152568717 | 152568717 | G     | A | 43 | 8  | 11 | Missense       | M306I   | Damaging                  | Probably damaging | Yes (2)   | No  | CCDS14724.1 |
| 2205 | ENAM    | 8  | 4  | 71728945  | 71728948  | TCAA  | - | 36 | 12 | 10 | Frameshift del | S980fs  | Damaging                  | Damaging          | Yes (3)   | No  | CCDS3544.1  |
| 2205 | GBP6    | 10 | 1  | 89623413  | 89623415  | AAG   | - | 45 | 12 | 13 | In frame del   | ΔK567   | nd                        | nd                | Yes (2)   | No  | CCDS723.1   |
| 2205 | HMGB1   | 3  | 13 | 29934772  | 29934772  | A     | T | 50 | 8  | 11 | Missense       | V125D   | Damaging                  | Probably damaging | Yes (2)   | No  | CCDS9335.1  |
| 2205 | HMGB1   | 3  | 13 | 29934833  | 29934833  | A     | G | 43 | 7  | 10 | Missense       | F105L   | Damaging                  | Possibly damaging | Yes (2)   | No  | CCDS9335.1  |
| 2205 | KLF2    | 3  | 19 | 16298726  | 16298726  | G     | A | 50 | 11 | 14 | Missense       | E318K   | Damaging                  | Probably damaging | No        | No  | CCDS12343.1 |
| 2205 | MAGEC3  | 1  | X  | 140812782 | 140812782 | C     | A | 25 | 12 | 21 | Missense       | F524L   | Tolerated                 | Possibly damaging | Yes (3)   | No  | CCDS14676.1 |
| 2205 | OFD1    | 1  | X  | 13663116  | 13663116  | T     | C | 83 | 7  | 4  | Missense       | M2T     | Damaging (low confidence) | Possibly damaging | No        | No  | CCDS14157.1 |
| 2205 | PCDHB10 | 1  | 5  | 140553576 | 140553576 | G     | A | 24 | 26 | 21 | Missense       | V423I   | Tolerated                 | Possibly damaging | Yes (1)   | No  | CCDS4252.1  |
| 2205 | PHOX2A  | 2  | 11 | 71629883  | 71629883  | C     | G | 42 | 13 | 4  | Missense       | E106Q   | Damaging                  | Possibly damaging | No        | No  | CCDS8214.1  |
| 2205 | TLL2    | 14 | 10 | 98136730  | 98136730  | C     | T | 25 | 16 | 17 | Missense       | E608K   | Damaging                  | Probably damaging | Yes (2)   | No  | CCDS7449.1  |
| 2205 | ZNF394  | 3  | 7  | 98929662  | 98929662  | G     | A | 30 | 11 | 11 | Missense       | S371F   | Damaging                  | Probably damaging | No        | No  | CCDS5666.1  |
| 2209 | AKAP8   | 14 | 19 | 15326900  | 15326901  | AT    | - | 25 | 13 | 13 | Frameshift del | H635fs  | Damaging                  | Damaging          | Yes (2)   | No  | CCDS12329.1 |
| 2209 | B2M     | 1  | 15 | 42791105  | 42791105  | T     | A | 47 | 18 | 12 | Splice site    | R23fs   | Damaging                  | Damaging          | Yes (2)   | No  | CCDS10113.1 |
| 2209 | CCND3   | 5  | 6  | 42011666  | 42011666  | A     | T | 43 | 7  | 6  | Missense       | I290K   | Damaging                  | Benign            | No        | Yes | CCDS4863.1  |
| 2209 | CREBBP  | 2  | 16 | 3840874   | 3840874   | G     | A | 75 | 9  | 6  | Nonsense       | R75*    | Damaging                  | Damaging          | Yes (10)  | Yes | CCDS10509.1 |
| 2209 | EXTL2   | 4  | 1  | 101112475 | 101112475 | A     | T | 37 | 8  | 11 | Missense       | S202T   | Tolerated                 | Benign            | No        | No  | CCDS775.1   |
| 2209 | KCNA5   | 1  | 12 | 5024215   | 5024215   | G     | A | 37 | 8  | 14 | Missense       | R214H   | Damaging                  | Probably damaging | Yes (4)   | No  | CCDS8536.1  |
| 2209 | MYH7    | 28 | 14 | 22957362  | 22957362  | C     | T | 37 | 8  | 3  | Missense       | E1356K  | Damaging                  | Possibly damaging | Yes (3)   | No  | CCDS9601.1  |
| 2209 | MYO1G   | 8  | 7  | 44977063  | 44977063  | G     | C | 27 | 11 | 7  | Missense       | L323V   | Tolerated                 | Benign            | Yes (3)   | No  | CCDS34629.1 |
| 2209 | PABPC5  | 1  | X  | 90577701  | 90577701  | G     | A | 40 | 15 | 12 | Missense       | A157T   | Damaging                  | Probably damaging | Yes (3)   | No  | CCDS14460.1 |
| 2209 | PCDHB3  | 1  | 5  | 140462098 | 140462098 | G     | A | 75 | 9  | 7  | Missense       | V561M   | Damaging                  | Probably damaging | Yes (2)   | No  | CCDS4245.1  |
| 2209 | PMS1    | 1  | 2  | 190364797 | 190364797 | C     | T | 75 | 4  | 8  | Missense       | A6V     | Damaging                  | Possibly damaging | Yes (4)   | Yes | CCDS2302.1  |
| 2209 | SMARCA1 | 8  | X  | 128467832 | 128467832 | C     | T | 37 | 8  | 10 | Missense       | R335H   | Damaging                  | Probably damaging | Yes (5)   | No  | CCDS14612.1 |
| 2209 | TMEM30A | 2  | 6  | 76034110  | 76034110  | A     | T | 40 | 10 | 15 | Nonsense       | C104*   | Damaging                  | Damaging          | No        | No  | CCDS4983.1  |
| 2209 | TNFAIP3 | 1  | 6  | 138234353 | 138234357 | GTAAG | - | 37 | 8  | 10 | Splice site    | G99fs   | Damaging                  | Damaging          | Yes (117) | Yes | CCDS5187.1  |
| 2210 | COL4A6  | 3  | X  | 107440641 | 107440641 | C     | T | 30 | 9  | 8  | Missense       | G47E    | Damaging                  | Unknown           | Yes (8)   | No  | CCDS14541.1 |
| 2210 | DCC     | 11 | 18 | 48988045  | 48988045  | A     | G | 19 | 17 | 7  | Splice site    | N575fs  | Damaging                  | Damaging          | Yes (9)   | No  | CCDS11952.1 |
| 2210 | FKBP9   | 7  | 7  | 33002401  | 33002401  | G     | A | 23 | 14 | 4  | Missense       | D381N   | Tolerated                 | Benign            | Yes (14)  | No  | CCDS5439.1  |
| 2210 | MED12L  | 15 | 3  | 152550628 | 152550630 | AGA   | - | 37 | 8  | 6  | In frame del   | ΔK746   | nd                        | nd                | Yes (5)   | No  | CCDS33876.1 |
| 2210 | OR51D1  | 1  | 11 | 4618421   | 4618421   | T     | A | 28 | 18 | 12 | Missense       | H275Q   | Damaging                  | Probably damaging | No        | No  | CCDS31357.1 |
| 2210 | RGAG1   | 1  | X  | 109582172 | 109582172 | G     | A | 23 | 29 | 21 | Missense       | M557I   | Tolerated                 | Benign            | Yes (3)   | No  | CCDS14552.1 |
| 2210 | SYNE1   | 58 | 6  | 152736050 | 152736050 | A     | G | 67 | 6  | 3  | Splice site    | E3116fs | Damaging                  | Damaging          | Yes (23)  | No  | CCDS5235.1  |

# In CCDS Reference Sequence

^ Numbering according to the Human Genome hg18 assembly

^^ For genes annotated in the COSMIC database, the number of mutations that have been reported is given in brackets

\*\*Cancer Gene Census database, March 2011 (<http://www.sanger.ac.uk/genetics/CGP/Census>)

Abbreviations: Refnt, reference nucleotide; Varnt, variant nucleotide; CovT, coverage tumor; CovN, coverage normal; %, fraction of sequence reads showing the variant nucleotide; AA, amino acid; fs, frameshift; Δ, deletion;

+, insertion; nd, not determined (The PolyPhen-2 algorithm predicts only the impact of amino acid substitutions)

**Supplementary Table 4. Germline mutations identified by Whole Exome Sequencing and not annotated in the dbSNP database (Release 132)**

| Sample ID | Gene     | Exon# | Chr | Start^    | End^      | Ref nt | Var nt   | %   | CovT | CovN | Mutation Type  | AA change    |
|-----------|----------|-------|-----|-----------|-----------|--------|----------|-----|------|------|----------------|--------------|
| 2112      | ADAMTS14 | 11    | 10  | 72168715  | 72168715  | G      | A        | 54  | 15   | -    | Missense       | G571R        |
| 2112      | DNAH3    | 37    | 16  | 20949939  | 20949939  | T      | A        | 55  | 13   | -    | Missense       | I1790F       |
| 2112      | FBL      | 2     | 19  | 45023207  | 45023207  | C      | T        | 100 | 4    | -    | Missense       | R24H         |
| 2112      | KLHL25   | 1     | 15  | 84113993  | 84113993  | A      | G        | 50  | 10   | -    | Missense       | M18T         |
| 2112      | LILRA1   | 5     | 19  | 59799035  | 59799039  | GGAGA  | TGGGG*   | 40  | 11   | -    | Missense       | GE261-262WG* |
| 2112      | MAP3K11  | 7     | 11  | 65130086  | 65130086  | G      | A        | 75  | 8    | -    | Missense       | P549L        |
| 2112      | MTMR15   | 1     | 15  | 28984876  | 28984876  | G      | A        | 33  | 15   | -    | Missense       | E240K        |
| 2112      | MYLK     | 11    | 3   | 124910250 | 124910250 | C      | T        | 80  | 5    | 6    | Missense       | V640M        |
| 2112      | NLRP12   | 3     | 19  | 59005086  | 59005086  | C      | T        | 36  | 11   | -    | Missense       | E547K        |
| 2112      | NLRP7    | 3     | 19  | 60143347  | 60143347  | T      | G        | 44  | 18   | -    | Missense       | M218L        |
| 2112      | NSMCE4A  | 3     | 10  | 123720467 | 123720467 | T      | C        | 60  | 5    | -    | Missense       | M160V        |
| 2112      | P2RX6    | 1     | 22  | 19699548  | 19699548  | A      | T        | 87  | 9    | -    | Nonsense       | K29*         |
| 2112      | PRKAR1B  | 2     | 7   | 686808    | 686808    | G      | C        | 75  | 4    | 9    | Missense       | P87A         |
| 2112      | RBMXL1   | 1     | 1   | 89221825  | 89221825  | T      | A        | 23  | 13   | 9    | Missense       | R91S         |
| 2112      | SIPA1L3  | 7     | 19  | 43302348  | 43302348  | G      | A        | 60  | 7    | -    | Missense       | V952M        |
| 2112      | TCHH     | 2     | 1   | 150350837 | 150350837 | -      | ins 14bp | 25  | 17   | 4    | Frameshift ins | E495fs       |
| 2112      | TRPM5    | 23    | 11  | 2383341   | 2383341   | C      | T        | 100 | 3    | -    | Missense       | G1128D       |
| 2203      | CLMN     | 9     | 14  | 94739127  | 94739127  | T      | G        | 67  | 8    | 4    | Missense       | E771R        |
| 2203      | FAM46A   | 1     | 6   | 82518509  | 82518509  | -      | ins 15bp | 75  | 5    | 2    | In frame ins   | L23+         |
| 2203      | FBXO17   | 1     | 19  | 44132510  | 44132510  | G      | C        | 60  | 5    | 1    | Missense       | A97G         |
| 2203      | LRIG2    | 15    | 1   | 113458629 | 113458629 | C      | T        | 43  | 9    | 10   | Missense       | A713V        |
| 2203      | LRRC16B  | 34    | 14  | 23604756  | 23604756  | G      | T        | 100 | 6    | 2    | Missense       | G1161V       |
| 2203      | NARFL    | 11    | 16  | 720576    | 720576    | C      | T        | 50  | 8    | 4    | Missense       | G425S        |
| 2203      | NLGN2    | 6     | 17  | 7259834   | 7259834   | G      | A        | 36  | 18   | 6    | Missense       | D440N        |
| 2203      | OAS2     | 10    | 12  | 111931327 | 111931327 | C      | T        | 57  | 8    | 3    | Missense       | R650C        |
| 2203      | SERPINA6 | 1     | 14  | 93850627  | 93850627  | C      | A        | 73  | 17   | 7    | Missense       | G38C         |
| 2203      | SLC16A9  | 5     | 10  | 61082565  | 61082565  | A      | C        | 50  | 11   | 2    | Missense       | F501V        |
| 2203      | SPSB3    | 2     | 16  | 1768452   | 1768452   | C      | T        | 57  | 8    | 5    | Missense       | G97R         |
| 2203      | SPTB     | 25    | 14  | 64309317  | 64309317  | T      | C        | 31  | 19   | 4    | Missense       | S1763G       |
| 2203      | TIA1     | 11    | 2   | 70295066  | 70295066  | T      | C        | 56  | 10   | 11   | Missense       | DN314        |
| 2203      | TIAM1    | 13    | 21  | 31459179  | 31459179  | A      | T        | 79  | 23   | 8    | Missense       | Q307R        |
| 2203      | TTC39B   | 14    | 9   | 15178134  | 15178134  | T      | A        | 40  | 18   | 12   | Splice site    | A412fs       |
| 2203      | UCN2     | 1     | 3   | 48575260  | 48575260  | G      | T        | 60  | 5    | 2    | Missense       | T101N        |
| 2203      | ULK1     | 16    | 12  | 130964854 | 130964854 | G      | A        | 36  | 12   | 12   | Missense       | A418T        |
| 2203      | UTRN     | 42    | 6   | 144895974 | 144895974 | G      | T        | 83  | 6    | 9    | Missense       | D2040Y       |
| 2203      | WDR81    | 1     | 17  | 1578578   | 1578578   | C      | T        | 60  | 5    | 5    | Missense       | T1192M       |
| 2203      | ZNF532   | 3     | 18  | 54757736  | 54757736  | T      | C        | 58  | 16   | 6    | Missense       | Y870H        |
| 2204      | AGBL5    | 11    | 2   | 27143910  | 27143912  | ATC    | -        | 50  | 11   | 17   | In frame del   | ΔH712        |
| 2204      | ARFGEF1  | 31    | 8   | 68292819  | 68292819  | C      | T        | 56  | 19   | 7    | Missense       | A1483S       |
| 2204      | C10orf90 | 3     | 10  | 128183115 | 128183115 | C      | T        | 75  | 20   | 6    | Missense       | G215E        |
| 2204      | CCDC66   | 10    | 3   | 56625096  | 56625098  | -      | TCT      | 38  | 20   | 18   | In frame ins   | S490+        |
| 2204      | DAO      | 6     | 12  | 107812255 | 107812255 | C      | T        | 67  | 10   | 3    | Missense       | R199W        |
| 2204      | DST      | 23    | 6   | 56593355  | 56593355  | T      | C        | 40  | 21   | 7    | Missense       | M1146V       |

|      |          |    |    |           |           |                      |      |     |    |    |                |        |
|------|----------|----|----|-----------|-----------|----------------------|------|-----|----|----|----------------|--------|
| 2204 | DUOX2    | 21 | 15 | 43180766  | 43180766  | T                    | C    | 42  | 19 | 5  | Splice site    | G951fs |
| 2204 | F11R     | 4  | 1  | 159237177 | 159237177 | G                    | A    | 67  | 16 | 15 | Missense       | R86W   |
| 2204 | F2RL2    | 2  | 5  | 75949683  | 75949683  | C                    | T    | 50  | 10 | 11 | Missense       | R202Q  |
| 2204 | FBXL13   | 18 | 7  | 102241087 | 102241090 | TAGA                 | -    | 71  | 8  | 6  | Frameshift del | K716fs |
| 2204 | HPS4     | 10 | 22 | 25189975  | 25189975  | T                    | C    | 50  | 13 | 6  | Missense       | M541V  |
| 2204 | LRRC55   | 1  | 11 | 56706205  | 56706205  | C                    | T    | 67  | 15 | 4  | Missense       | R88C   |
| 2204 | NR1D2    | 8  | 3  | 23993918  | 23993918  | C                    | T    | 70  | 23 | 3  | Splice site    | P579fs |
| 2204 | OR2T4    | 1  | 1  | 246591561 | 246591561 | T                    | G    | 80  | 12 | 17 | Missense       | M19R   |
| 2204 | SLC7A14  | 1  | 3  | 171727302 | 171727302 | C                    | T    | 50  | 9  | 11 | Missense       | G40R   |
| 2204 | TACC2    | 3  | 10 | 123835139 | 123835139 | C                    | T    | 60  | 5  | 4  | Missense       | P1045L |
| 2204 | TCF3     | 18 | 19 | 1562736   | 1562736   | G                    | C    | 80  | 7  | 8  | Missense       | S645R  |
| 2204 | TSHZ3    | 2  | 19 | 36461133  | 36461133  | T                    | C    | 50  | 8  | 9  | Missense       | E469G  |
| 2204 | VRK2     | 4  | 2  | 58167059  | 58167059  | G                    | A    | 45  | 18 | 7  | Missense       | G113E  |
| 2205 | C15orf27 | 6  | 15 | 74250450  | 74250450  | A                    | G    | 44  | 9  | 8  | Missense       | N192S  |
| 2205 | C16orf84 | 14 | 16 | 87309113  | 87309113  | C                    | T    | 37  | 8  | 3  | Missense       | P481L  |
| 2205 | CDSN     | 2  | 6  | 31191924  | 31191924  | C                    | T    | 100 | 7  | 4  | Missense       | A483T  |
| 2205 | CLEC18B  | 9  | 16 | 73002364  | 73002364  | G                    | A    | 25  | 12 | 12 | Missense       | R352C  |
| 2205 | CTU2     | 14 | 16 | 87309113  | 87309113  | C                    | T    | 37  | 8  | 3  | Missense       | P481L  |
| 2205 | E2F8     | 10 | 11 | 19203863  | 19203863  | G                    | C    | 33  | 12 | 10 | Missense       | P673R  |
| 2205 | GIGYF2   | 20 | 2  | 233405971 | 233405971 | G                    | A    | 80  | 5  | 2  | Missense       | R897H  |
| 2205 | GPLD1    | 5  | 6  | 24583389  | 24583389  | G                    | A    | 50  | 8  | 3  | Missense       | A127V  |
| 2205 | GPRIN2   | 1  | 10 | 46419215  | 46419215  | G                    | A    | 38  | 13 | 11 | Missense       | R110Q  |
| 2205 | GRP      | 3  | 18 | 55048655  | 55048658  | GGAA                 | -    | 50  | 18 | 10 | Frameshift del | R141fs |
| 2205 | HBEGF    | 2  | 5  | 139705773 | 139705773 | G                    | A    | 75  | 4  | 8  | Missense       | P43S   |
| 2205 | MAMDC4   | 5  | 9  | 138868103 | 138868122 | TGGCAGAGCACAGGGCCCTG | -    | 43  | 8  | 3  | Frameshift del | W170fs |
| 2205 | PADI3    | 5  | 1  | 17465819  | 17465819  | C                    | T    | 44  | 9  | 8  | Missense       | P143S  |
| 2205 | PRG2     | 3  | 11 | 56912693  | 56912693  | C                    | T    | 68  | 20 | 4  | Missense       | R144Q  |
| 2205 | PTK2B    | 26 | 8  | 27366590  | 27366590  | C                    | T    | 60  | 5  | -  | Missense       | A864V  |
| 2205 | RBP3     | 4  | 10 | 48001988  | 48001988  | G                    | A    | 100 | 4  | 4  | Missense       | L1223F |
| 2205 | SIM2     | 10 | 21 | 37039088  | 37039088  | G                    | A    | 44  | 19 | 10 | Missense       | V453I  |
| 2209 | AARS2    | 11 | 6  | 44380814  | 44380814  | C                    | G    | 50  | 7  | 5  | Missense       | D512H  |
| 2209 | ABCG8    | 4  | 2  | 43932394  | 43932394  | C                    | T    | 50  | 9  | 2  | Nonsense       | R164*  |
| 2209 | IPO9     | 5  | 1  | 200087888 | 200087888 | C                    | A    | 60  | 5  | 9  | Missense       | P183Q  |
| 2209 | LRRC8E   | 2  | 19 | 7870859   | 7870859   | C                    | A    | 55  | 11 | 8  | Missense       | D484E  |
| 2209 | OR4M2    | 1  | 15 | 19870180  | 19870180  | -                    | TAAA | 53  | 20 | 16 | Frameshift ins | M81fs  |
| 2209 | PDHX     | 11 | 11 | 34973068  | 34973068  | G                    | A    | 37  | 8  | 6  | Missense       | E427K  |
| 2209 | PES1     | 11 | 22 | 29306109  | 29306109  | T                    | A    | 67  | 12 | 5  | Missense       | D367V  |
| 2209 | PUSL1    | 7  | 1  | 1236201   | 1236201   | C                    | T    | 100 | 6  | 6  | Missense       | A250V  |
| 2209 | RNF113B  | 1  | 13 | 97627389  | 97627389  | T                    | G    | 75  | 4  | -  | Missense       | K35Q   |
| 2209 | RTN1     | 3  | 14 | 59264032  | 59264032  | G                    | A    | 75  | 4  | 2  | Missense       | R375W  |
| 2209 | SMEK1    | 14 | 14 | 90997657  | 90997657  | C                    | T    | 50  | 6  | 3  | Missense       | G725R  |
| 2209 | TMEM180  | 3  | 10 | 104220467 | 104220467 | G                    | A    | 50  | 8  | -  | Missense       | G103S  |
| 2210 | C2orf3   | 3  | 2  | 75782889  | 75782889  | C                    | T    | 44  | 9  | 7  | Missense       | R188K  |
| 2210 | C5orf15  | 2  | 5  | 133323316 | 133323316 | T                    | C    | 64  | 11 | 4  | Missense       | N145S  |
| 2210 | C9orf43  | 9  | 9  | 115227487 | 115227487 | -                    | GCA  | 44  | 10 | 11 | In frame ins   | Q303+  |
| 2210 | CHD1     | 28 | 5  | 98234400  | 98234400  | G                    | A    | 67  | 6  | 5  | Missense       | P1290L |

|      |          |    |    |           |           |   |          |     |    |    |              |        |
|------|----------|----|----|-----------|-----------|---|----------|-----|----|----|--------------|--------|
| 2210 | CLK1     | 9  | 2  | 201428051 | 201428051 | A | G        | 67  | 6  | -  | Missense     | L354P  |
| 2210 | DYNC1LI1 | 2  | 3  | 32586842  | 32586842  | - | ins 18bp | 78  | 10 | 9  | In frame ins | G74+   |
| 2210 | DYSF     | 30 | 2  | 71654858  | 71654858  | - | CGGAGG   | 60  | 5  | 8  | In frame ins | G1066+ |
| 2210 | EVPL     | 22 | 17 | 71517924  | 71517924  | C | T        | 75  | 4  | 7  | Missense     | R986Q  |
| 2210 | ARHGEF40 | 3  | 14 | 20612981  | 20612981  | C | T        | 71  | 7  | 3  | Missense     | P418S  |
| 2210 | GLIS1    | 7  | 1  | 53747441  | 53747441  | C | T        | 60  | 6  | 7  | Missense     | G549S  |
| 2210 | KBTBD6   | 1  | 13 | 40604613  | 40604613  | C | T        | 62  | 8  | 7  | Missense     | R12H   |
| 2210 | PDE4DIP  | 3  | 1  | 143727234 | 143727234 | G | T        | 21  | 14 | 12 | Missense     | L142I  |
| 2210 | PIH1D1   | 4  | 19 | 54643069  | 54643069  | C | A        | 100 | 4  | 2  | Splice site  | Q132fs |
| 2210 | PLEKHO1  | 6  | 1  | 148398233 | 148398233 | A | G        | 80  | 6  | 3  | Missense     | Q374R  |
| 2210 | SLC2A4   | 5  | 17 | 7128023   | 7128023   | C | T        | 50  | 6  | 6  | Missense     | T152I  |
| 2210 | SLFN11   | 3  | 17 | 30704621  | 30704621  | C | T        | 50  | 14 | 10 | Missense     | R590H  |
| 2210 | TAF6     | 14 | 7  | 99542828  | 99542828  | C | T        | 100 | 5  | 4  | Missense     | G671S  |
| 2210 | TDRD6    | 1  | 6  | 46768854  | 46768854  | T | C        | 64  | 12 | -  | Missense     | I1677T |
| 2210 | TEX15    | 1  | 8  | 30824989  | 30824989  | T | C        | 50  | 15 | 5  | Missense     | M363V  |
| 2210 | USP21    | 6  | 1  | 159399997 | 159399997 | A | G        | 37  | 9  | 5  | Missense     | K360E  |
| 2210 | USP31    | 16 | 16 | 22988154  | 22988154  | G | C        | 62  | 9  | 8  | Missense     | P925A  |

# In CCDS Reference Sequence

^ Numbering according to the Human Genome hg18 assembly

\* Unclear interpretation on Sanger sequencing

Abbreviations: Refnt, reference nucleotide; Varnt, variant nucleotide; CovT, coverage tumor; CovN, coverage normal; %, fraction of sequence reads showing the variant nucleotide; AA, amino acid; fs, frameshift; +, insertion



|      |    |                   |           |           |      |            |      |                                                                                        |    |
|------|----|-------------------|-----------|-----------|------|------------|------|----------------------------------------------------------------------------------------|----|
| 2204 | 13 | 13q11 - 13q34     | 17924937  | 114126487 | 2.87 | 96201.550  | 364  | LOC284232 LOC348021 DKFZp686A1627 TUBA3C LOC100101938 TPTE2 MPHOSPH8 PSPC1 ZMYM5 ZMYM: | 14 |
| 2204 | 17 | 17p13.3 - 17p11.2 | 514       | 18065802  | 1.35 | 18065.288  | 318  | RPH3AL C17orf97 FAM101B VPS53 FAM57A GEMIN4 ELP2P GLOD4 RNMTL1 NXN                     | 11 |
| 2204 | 17 | 17p11.2           | 18065982  | 18384390  | 2.54 | 318.408    | 11   | LLGL1 FLII SMCR7 TOP3A SMCR8 SHMT1 EVPLL LOC339240 LGALS9C LOC220594                   | 0  |
| 2204 | 17 | 17q23.3 - 17q25.3 | 59342527  | 78643088  | 2.41 | 19300.561  | 266  | GH1 CD79B SCN4A C17orf72 ICAM2 ERN1 SNORD104 SNORA76 TEX2 PECAM1                       | 7  |
| 2204 | 18 | 18p11.32 - 18q23  | 1543      | 76116029  | 2.72 | 76114.486  | 292  | USP14 THOC1 COLEC12 CETN1 CLUL1 C18orf56 TYMS ENOSF1 YES1 ADCYAP1                      | 9  |
| 2204 | 21 | 21p11.2 - 21p11.1 | 9758730   | 10197771  | 1.18 | 439.041    | 6    | TPTE BAGE5 BAGE3 BAGE4 BAGE2 BAGE                                                      | 0  |
| 2204 | Y  | Yq11.21 - Yq11.23 | 14079303  | 57728335  | 1.15 | 43649.032  | 64   | UTY TMSB4Y VCY1B VCY NLGN4Y FAM41AY2 FAM41AY1 NCRNA00230B NCRNA00230A XKRY             | 0  |
| 2205 | 1  | 1p36.33 - 1p35.2  | 51586     | 33172955  | 1.56 | 33121.369  | 493  | OR4F5 LOC100132062 LOC100133331 LOC100132287 OR4F3 OR4F29 OR4F16 NCRNA00115 LOC643837  | 9  |
| 2205 | 1  | 1q21.3 - 1q25.1   | 152859696 | 172135734 | 1.71 | 19276.038  | 305  | ADAR KCNN3 PMVK PBXIP1 PYGO2 SHC1 CKS1B FLAD1 LENEZ ZBTB7B                             | 11 |
| 2205 | 1  | 1q25.2            | 175729961 | 175762917 | 1.33 | 32.956     | 0    |                                                                                        | 0  |
| 2205 | 1  | 1q31.1 - 1q44     | 185283605 | 247190999 | 2.48 | 61907.394  | 436  | FAM5C RGS18 RGS21 RGS1 RGS13 RGS2 UCHL5 TROVE2 GLRX2 CDC73                             | 14 |
| 2205 | 2  | 2p11.1;q11.1      | 91638457  | 94691602  | 0.88 | 3053.145   | 0    | (centromeric region)                                                                   | 0  |
| 2205 | 2  | 2q21.3 - 2q24.3   | 136652914 | 168352732 | 1.36 | 31699.818  | 80   |                                                                                        | 1  |
| 2205 | 3  | 3p12.3            | 77638126  | 77695070  | 1.40 | 56.944     | 1    | ROBO2                                                                                  | 0  |
| 2205 | 3  | 3q27.3;q28        | 187955510 | 189858646 | 1.44 | 1903.136   | 18   | EIF4A2 SNORD2 MIR1248 SNORA81 SNORA63 SNORA4 RFC4 ADIPOQ ST6GAL1 RPL39L                | 1  |
| 2205 | 4  | 4q13.1            | 65863932  | 65938754  | 1.40 | 74.822     | 1    | EPHA5                                                                                  | 0  |
| 2205 | 6  | 6q23.2;q23.3      | 135174467 | 137363938 | 1.45 | 2189.471   | 15   | ALDH8A1 HBS1L MYB AHI1 MIR548H4 C6orf217 PDE7B FAM54A BCLAF1 MAP7                      | 1  |
| 2205 | 6  | 6q23.3            | 137367796 | 138585301 | 0.95 | 1217.505   | 8    | IL20RA IL22RA2 IFNGR1 OLIG3 TNFAIP3 PERP KIAA1244 PBOV1                                | 0  |
| 2205 | 6  | 6q23.3 - q25.2    | 138585800 | 155045608 | 1.45 | 16459.808  | 75   | KIAA1244 HEBP2 NHSL1 CCDC28A ECT2L REPS1 C6orf115 HECA TXLNB CITED2                    | 0  |
| 2205 | 13 | 13q21.31          | 61299128  | 61322787  | 1.08 | 23.659     | 0    |                                                                                        | 0  |
| 2205 | 19 | 19p12 - 19q12     | 24167277  | 32657343  | 1.29 | 8490.066   | 0    |                                                                                        | 0  |
| 2209 | 6  | 6q13 - 6q25.3     | 73505939  | 159545634 | 1.36 | 86039.695  | 377  | KCNQ5 KHDC1L KHDC1 C6orf147 DPPA5 C6orf221 OEP DDX43 C6orf150 MTO1                     | 6  |
| 2210 | 1  | 1q21.1 - 1q31.2   | 142693888 | 191475047 | 2.16 | 48781.159  | 639  | PDE4DIP                                                                                | 26 |
| 2210 | 1  | 1q31.2            | 191475560 | 191488526 | 4.58 | 12.966     | 1    | CDC73                                                                                  | 0  |
| 2210 | 1  | 1q31.2 - 1q44     | 191491706 | 247190999 | 2.23 | 55699.293  | 1273 | PTBP2 DPYD MIR137 SNX7 LPPR5 LOC100129620 LPPR4 PALMD FRRS1 AGL                        | 62 |
| 2210 | 3  | 3p26.3 - 3q29     | 35333     | 199380503 | 2.27 | 199345.170 | 1189 | CHL1 CNTN6 CNTN4 IL5RA TRNT1 CRBN LRRN1 SETMAR SUMF1 ITPR1                             | 67 |
| 2210 | 5  | 5p15.33 - 5q35.3  | 68520     | 180722914 | 2.27 | 180654.394 | 981  | CCDC125 TAF9 RAD17 PLEKHG4B MARVELD2 LRRC14B CCDC127 SDHA OCLN PDCD6                   | 62 |
| 2210 | 6  | 6p25.3 - 6p11.2   | 94649     | 57758722  | 2.27 | 57664.073  | 673  | TRIM27 ZNF311 DUSP22 OR2W1 LOC100129636 LOC401242 OR2B3 OR2J3 IRF4 OR2J2               | 22 |
| 2210 | 6  | 6p11.2            | 57759523  | 58179324  | 1.52 | 419.801    | 0    |                                                                                        | 0  |
| 2210 | 6  | 6p11.2 - 6q11.1   | 58190043  | 62067209  | 2.30 | 3877.166   | 1    | GUSBP4                                                                                 | 0  |
| 2210 | 6  | 6q11.1 - 6q14.1   | 62067505  | 76120636  | 1.56 | 14053.131  | 36   | KHDRBS2 LGSN PTP4A1 PHF3 EYS MCART3P BAI3 LMBRD1 COL19A1 COL9A1                        | 2  |
| 2210 | 6  | 6q14.1 - q616.1   | 76121163  | 92554936  | 2.27 | 16433.773  | 64   | FILIP1 SENP6 MYO6 IMPG1 HTR1B IRAK1BP1 PHIP HMG3 LCA5 SH3BGR2                          | 3  |
| 2210 | 6  | 6q16.1 - 6q16.3   | 92556135  | 103840867 | 1.54 | 11284.732  | 23   | EPHA7 TSG1 MANEA FUT9 KIAA0776 FHL5 GPR63 NDUFAF4 KLHL32 C6orf167                      | 1  |
| 2210 | 6  | 6q16.3            | 103841326 | 103868730 | 2.25 | 27.404     | 0    |                                                                                        | 0  |
| 2210 | 6  | 6q16.3 - 6q21     | 103868742 | 111038725 | 1.58 | 7169.983   | 41   | HACE1 LIN28B BVES POPDC3 C6orf112 PREP PRDM1 ATG5 AIM1 RTN4IP1                         | 1  |
| 2210 | 6  | 6q21              | 111041147 | 111687254 | 2.31 | 646.107    | 6    | CDK19 AMD1 GTF3C6 RPF2 GSTM2P1 SLC16A10                                                | 0  |
| 2210 | 6  | 6q21 - 6q24.2     | 111690279 | 143202785 | 1.73 | 31512.506  | 148  | KIAA1919 REV3L TRAF3IP2 FYN WISP3 TUBE1 C6orf225 LAMA4 RFPL4B MARCKS                   | 3  |
| 2210 | 6  | 6q24.2 - 6q25.1   | 143204925 | 152424193 | 2.27 | 9219.268   | 52   | AIG1 ADAT2 PEX3 FUCA2 LOC285740 PHACTR2 LTV1 C6orf94 PLAGL1 HYMAI                      | 0  |
| 2210 | 6  | 6q25.1 - 6q25.3   | 152426493 | 157695987 | 1.58 | 5269.494   | 16   | ESR1 SYNE1 MYCT1 VIP FBXO5 MTRF1L RGS17 OPRM1 IPCEF1 CNKSR3                            | 3  |
| 2210 | 6  | 6q26 - 6q27       | 161247281 | 165933532 | 1.53 | 4686.251   | 9    | MAP3K4 AGPAT4 NCRNA00241 PARK2 PACRG LOC285796 QKI C6orf118 PDE10A                     | 0  |
| 2210 | 6  | 6q27              | 165933750 | 170892918 | 2.15 | 4959.168   | 40   | PDE10A C6orf176 LOC441177 T PRR18 SFT2D1 BRP44L RPS6KA2 MIR1913 RNASET2                | 3  |
| 2210 | 7  | 7p22.3 - 7q31.1   | 52899     | 110759081 | 2.27 | 110706.182 | 719  | FAM20C PDGFA FLJ44511 PRKAR1B HEATR2 SUN1 GET4 ADAP1 COX19 CYP2W1                      | 45 |
| 2210 | 8  | 8q13.3 - 8q24.3   | 72955205  | 146268947 | 2.27 | 73313.742  | 372  | TRPA1 LOC100132891 LOC392232 KCNB2 TERF1 C8orf84 LOC100130301 RPL7 RDH10 STAU2         | 37 |
| 2210 | 13 | 13q11 - 13q34     | 17924937  | 114126487 | 2.25 | 96201.550  | 384  | LOC284232 LOC348021 DKFZp686A1627 TUBA3C LOC100101938 TPTE2 MPHOSPH8 PSPC1 ZMYM5 ZMYM: | 31 |
| 2210 | 15 | 15q26.3           | 98242463  | 100217560 | 1.52 | 1975.097   | 15   | ADAMTS17 FLJ42289 LASS3 LINS1 ASB7 ALDH1A3 LRRK1 CHSY1 SELS SNRPA1                     | 0  |
| 2210 | 19 | 19q13.42          | 60859780  | 61226466  | 1.58 | 366.686    | 9    | U2AF2 EPN1 NLRP9 RFPL4A NLRP11 NLRP4 NLRP13 NLRP8 NLRP5                                | 0  |
| 2210 | X  | Xp22.33 - Xq28    | 108465    | 154632859 | 2.68 | 154524.394 | 944  | PLCXD1 PPP2R3B SHOX CRLF2 CSF2RA IL3RA SLC25A6 NCRNA00105 ASMTL P2RY8                  | 76 |

^ Numbering according to the Human Genome hg18 assembly

Note: segments highlighted in grey represent subclonal lesions, as confirmed by FISH analysis in selected chromosomes (e.g., trisomy of chr. 3, observed in 10% of the nuclei). These segments were not computed in the calculation of the total load of genetic lesions presented in Figure 3

**Supplementary Table 6. Enriched functional categories in DLBCL altered genes (DAVID analysis)**

| <b>Category</b>                                    | <b>Enrichment Score</b> | <b>P-value</b> | <b>Benjamini</b> |
|----------------------------------------------------|-------------------------|----------------|------------------|
| Regulation of transcription                        | 5.336                   | 1.05E-08       | 2.45E-05         |
| Lymphocyte activation/differentiation              | 2.835                   | 5.23E-07       | 6.08E-04         |
| Regulation of T cell activation/differentiation    | 2.288                   | 5.91E-06       | 0.002            |
| Cyclin-dependent protein kinase regulator activity | 1.143                   | 3.41E-05       | 0.008            |
| Chromatin modification                             | 3.354                   | 8.26E-05       | 0.008            |
| T cell proliferation/activation                    | 1.675                   | 1.02E-04       | 0.009            |
| Nuclear component                                  | 2.466                   | 2.41E-05       | 0.009            |
| Myeloid dendritic cell activation/differentiation  | 1.919                   | 1.15E-04       | 0.010            |
| DNA methylation                                    | 2.493                   | 2.61E-04       | 0.049            |
| Cell adhesion                                      | 2.218                   | 0.002          | 0.063            |
| Cell cycle checkpoint                              | 1.576                   | 0.002          | 0.089            |
| Antigen processing and presentation                | 1.809                   | 7.48E-04       | 0.092            |
| Regulation of cell projection                      | 0.903                   | 0.003          | 0.096            |
| B cell activation/differentiation                  | 1.449                   | 0.003          | 0.107            |
| Protein binding                                    | 1.756                   | 0.001          | 0.110            |
| Regulation of apoptosis                            | 1.481                   | 0.004          | 0.125            |
| GTPase binding                                     | 2.230                   | 0.003          | 0.159            |
| Plasma membrane component                          | 1.134                   | 0.004          | 0.179            |
| Regulation of cell growth                          | 0.963                   | 0.010          | 0.228            |
| Regulation of protein kinase activity              | 1.171                   | 0.011          | 0.248            |
| Tube development                                   | 1.348                   | 0.012          | 0.258            |
| Response to radiation                              | 0.726                   | 0.013          | 0.258            |
| MHC protein binding                                | 0.658                   | 0.008          | 0.265            |
| Regulation of immune response                      | 1.068                   | 0.013          | 0.267            |
| Regulation of cAMP biosynthetic process            | 0.803                   | 0.020          | 0.350            |
| Tumor necrosis factor binding                      | 1.125                   | 0.017          | 0.351            |
| Nucleotide binding                                 | 1.623                   | 0.012          | 0.355            |
| JNK MAP cascade                                    | 1.009                   | 0.025          | 0.402            |
| Phosphatase activity                               | 1.040                   | 0.028          | 0.429            |
| Histone deacetylase activity                       | 0.997                   | 0.016          | 0.430            |
| RNA localization                                   | 0.888                   | 0.030          | 0.440            |
| Peptide transport/secretion                        | 1.074                   | 0.030          | 0.440            |
| Response to hypoxia                                | 0.258                   | 0.030          | 0.443            |
| Ear development                                    | 0.854                   | 0.034          | 0.456            |
| Nuclear/Mitochondrial envelope                     | 0.292                   | 0.015          | 0.478            |
| Sensory perception                                 | 0.592                   | 0.037          | 0.479            |
| Cell morphogenesis                                 | 0.828                   | 0.041          | 0.499            |
| Regulation of DNA binding                          | 1.022                   | 0.042          | 0.503            |
| Regulation of DNA binding                          | 0.645                   | 0.042          | 0.503            |
| Cell cycle                                         | 0.479                   | 0.044          | 0.505            |
| Lymphocyte proliferation                           | 0.993                   | 0.046          | 0.519            |
| Transforming growth factor beta binding            | 1.005                   | 0.039          | 0.522            |
| Mitochondrial transport                            | 0.658                   | 0.047          | 0.528            |
| Ion channel activity                               | 0.690                   | 0.042          | 0.531            |
| Ion binding                                        | 1.020                   | 0.046          | 0.549            |

**Supplementary Table 7. Significant regions of deletion in DLBCL according to the GISTIC algorithm**

| Cytoband | q value    | Residual q value | Wide peak boundaries      | Total N of genes | Gene names (first 20 genes in region)                                                                                                          |
|----------|------------|------------------|---------------------------|------------------|------------------------------------------------------------------------------------------------------------------------------------------------|
| 1p36.31  | 2.10E-05   | 0.00015508       | chr1:5736742-6359635      | 9                | RPL22 KCNAB2 ACOT7 ICMT CHD5 NPHP4 GPR153 RNF207 HES3                                                                                          |
| 1p13.1   | 7.45E-08   | 7.45E-08         | chr1:116878071-116919472  | 2                | CD58 IGSF3                                                                                                                                     |
| 1q42.12  | 0.013866   | 0.041044         | chr1:224370620-225066589  | 6                | PARP1 ITPKB ACBD3 MIXL1 LIN9 C1orf95                                                                                                           |
| 2q22.3   | 0.079791   | 0.079791         | chr2:142281763-148092099  | 5                | KYNU ZEB2 LRP1B ARHGAP15 GTDC1                                                                                                                 |
| 3p14.2   | 1.03E-10   | 1.03E-10         | chr3:60416800-60452452    | 1                | FHIT                                                                                                                                           |
| 4p15.1   | 0.00068122 | 0.00068122       | chr4:29660618-31420982    | 1                | PCDH7                                                                                                                                          |
| 4q34.1   | 0.00097534 | 0.057584         | chr4:172327318-172866785  | 1                | GALNT17                                                                                                                                        |
| 6q21     | 1.24E-13   | 1.24E-13         | chr6:106420940-110855391  | 34               | hsa-mir-587 AIM1 PRDM1 FOXO3 GPR6 SMPD2 NR2E1 DDO SNX3 CD164 WASF1 ATG5 ZBTB24 FIG4 SEC63 SESN1 OSTM1 C6orf203 CDC40 SOBP                      |
| 6q23.3   | 2.34E-13   | 0.030288         | chr6:137447314-138401397  | 4                | TNFAIP3 OLIG3 IL22RA IFNGR1                                                                                                                    |
| 7q32.1   | 0.090495   | 0.090495         | chr7:127206505-129956043  | 39               | hsa-mir-335 hsa-mir-183 hsa-mir-129-1 hsa-mir-593 OPN1SW CALU CPA1 CPA2 FLNC IMPDH1 IRF5 LEP MEST NRF1 SMO UBE2H ATP6V1F KIAA0265 AHCYL2 TNPO3 |
| 8p23.3   | 9.12E-08   | 9.12E-08         | chr8:591044-2318161       | 7                | hsa-mir-596 CLN8 MYOM2 DLGAP2 ARHGEF10 KBTBD11 ERICH1                                                                                          |
| 9p21.3   | 1.19E-22   | 1.19E-22         | chr9:21966859-21986983    | 1                | CDKN2A                                                                                                                                         |
| 10q24.32 | 0.14377    | 0.14377          | chr10:102841044-114442753 | 73               | hsa-mir-609 hsa-mir-936 hsa-mir-146b ADD3 ADRA2A ARL3 COL17A1 CYP17A1 DUSP5 FGF8 TLX1 MXI1 NFKB2 PITX3 PSD FBXW4 TAF5 TECTB XPNPEP1 SHOC2      |
| 12q24.33 | 0.22126    | 0.22126          | chr12:131799881-131902313 | 3                | GOLGA3 ANKLE2 PGAM5                                                                                                                            |
| 13q14.3  | 0.0044568  | 0.0044568        | chr13:48174250-49867923   | 15               | hsa-mir-15a MLNR KPNA3 TRIM13 FNDC3A PHF11 RCBTB1 CYSLTR2 C13orf1 CDADC1 CAB39L SETDB2 EBPL ARL11 KCNRG                                        |
| 14q32.32 | 0.18402    | 0.18402          | chr14:102081628-102445346 | 2                | TRAF3 RCOR1                                                                                                                                    |
| 15q21.1  | 1.50E-16   | 1.5E-16          | chr15:42769393-42798306   | 1                | B2M                                                                                                                                            |
| 16q12.2  | 0.038012   | 0.038012         | chr16:52334966-55602461   | 32               | hsa-mir-138-2 AMFR BBS2 CES1 CETP GNAO1 MMP2 MT1A MT1B MT1E MT1F MT1G MT1H MT1M MT1X MT2A MT3 SLC6A2 SLC12A3 NUP93                             |
| 17p13.1  | 3.76E-09   | 3.76E-09         | chr17:7295122-7524765     | 17               | ATP1B2 CD68 CHRN1 EIF4A1 POLR2A SHBG SOX15 TP53 TNFSF13 TNFSF12 FXR2 MPDU1 SENP3 ZBTB4 SAT2 TNFSF12-TNFSF13 AMAC1L3                            |
| 18q22.3  | 0.013866   | 0.013866         | chr18:65346422-69222105   | 6                | SOCS6 CD226 RTTN NETO1 CBLN2 DOK6                                                                                                              |
| 19p13.3  | 0.00068122 | 0.00068122       | chr19:6470458-6533436     | 1                | TNFSF9                                                                                                                                         |



**Supplementary Table 8. Significant regions of amplification in DLBCL according to the GISTIC algorithm**

| Cytoband | q value    | Residual q value | Wide peak boundaries      | Total N of genes | Gene names (first 20 genes in region)                                                                                                                          |
|----------|------------|------------------|---------------------------|------------------|----------------------------------------------------------------------------------------------------------------------------------------------------------------|
| 1q25.1   | 1.94E-05   | 1.94E-05         | chr1:172017518-175588211  | 17               | hsa-mir-488 ASTN1 SERPINC1 TNR GPR52 RABGAP1L CACYBP<br>KLHL20 DARS2 FAM5B PAPPA2 TNN MRPS14 RFWD2 ZBTB37<br>CENPL RC3H1                                       |
| 2p16.1   | 2.38E-09   | 2.38E-09         | chr2:60854354-61001391    | 2                | REL PAPOLG                                                                                                                                                     |
| 3q12.3   | 0.0027524  | 0.0027524        | chr3:102748375-126619117  | 126              | hsa-mir-198 hsa-mir-568 hsa-mir-567 ADCY5 ADPRH ALCAM<br>ATP6V1A CASR CBLB CD80 CD86 CD47 CSTA DRD3 GAP43<br>GOLGB1 GSK3B GTF2E1 HCLS1 HGD                     |
| 5p13.2   | 0.084633   | 0.084633         | chr5:34945647-39658596    | 28               | hsa-mir-580 C9 DAB2 FYB GDNF IL7R LIFR PRLR RAD1 SKP2<br>SLC1A3 OSMR NUP155 NIPBL WDR70 BXDC2 AGXT2 C5orf42<br>SPEF2 LMBRD2                                    |
| 6p21.32  | 0.01695    | 0.01695          | chr6:31641586-32562240    | 58               | AGER AIF1 CFB C2 C4A C4B CLIC1 CREBL1 CSNK2B CYP21A2<br>DOM3Z HLA-DRA HSPA1A HSPA1B HSPA1L LTA LTB MSH5 NEU1<br>NOTCH4                                         |
| 7q21.13  | 0.0015045  | 0.0015045        | chr7:83319325-99776465    | 113              | hsa-mir-106b hsa-mir-591 hsa-mir-489 ASNS AZGP1 CALCR KRIT1<br>CDK6 COL1A2 CYP3A7 CYP3A4 CYP3A5 CYP51A1 DLX5 DLX6<br>DYNC111 GNG11 GNGT1 GRM3 MCM7             |
| 8q24.21  | 0.0094423  | 0.0094423        | chr8:127021989-128834542  | 2                | MYC FAM84B                                                                                                                                                     |
| 9p24.1   | 0.00017135 | 0.00017135       | chr9:5486919-5566409      | 1                | PDCD1LG2                                                                                                                                                       |
| 9p13.2   | 0.0012577  | 0.057507         | chr9:35988727-37238610    | 9                | CCIN CLTA PAX5 RECK MELK GNE ZCCHC7 RNF38 C9orf19                                                                                                              |
| 11q23.3  | 0.0012577  | 0.0012577        | chr11:116789150-117413537 | 6                | FXVD2 IL10RA CEP164 FXVD6 DSCAML1 Tmprss13                                                                                                                     |
| 12q14.1  | 0.002096   | 0.002096         | chr12:58692629-68346744   | 45               | hsa-mir-548c hsa-let-7i AVPR1A CPM GNS IFNG LYZ MDM2<br>RAP1B YEATS4 HMGA2 DYRK2 USP15 TMEM5 CCT2 FRS2<br>CPSF6 WIF1 IRAK3 XPOT                                |
| 13q32.3  | 0.22085    | 0.22085          | chr13:90219486-99997053   | 31               | hsa-mir-623 hsa-mir-92a-1 DCT EBI2 GPC5 GPR18 RANBP5<br>PCCA DNAJC3 RAP2A SLC15A1 ZIC2 STK24 CLDN10 TM9SF2<br>GPC6 MBNL2 FARP1 ABCC4 SOX21                     |
| 18q21.2  | 1.55E-08   | 0.12602          | chr18:50839879-51607473   | 1                | TCF4                                                                                                                                                           |
| 18q21.33 | 2.44E-09   | 2.44E-09         | chr18:58944230-59229769   | 3                | BCL2 KDSR VPS4B                                                                                                                                                |
| 19q13.33 | 0.15813    | 0.15813          | chr19:54014687-62347297   | 267              | hsa-mir-935 hsa-mir-373 hsa-mir-519a-2 hsa-mir-643 hsa-mir-125a<br>hsa-mir-150 AP2A1 KLK3 BAX CD33 SIGLEC6 CD37 CGB ETV6<br>FCAR FCGRT FLT3LG FPR1 FPRL1 FPRL2 |

**Supplementary Table 9. Somatic mutations in recurrently mutated WES and MCR genes**This table does not include previously identified genes as well as *MLL2*, *B2M*, *CD58* and *MEF2B*, which are reported separately

| Gene Symbol     | Sample ID         | Subtype | Exon | Nucleotide change* | AA change* | PolyPhen-2 prediction (score) | Affected functional domain | mRNA RefSeq    |
|-----------------|-------------------|---------|------|--------------------|------------|-------------------------------|----------------------------|----------------|
| <i>ADAMTSL3</i> | 2134              | GCB     | E13  | T1519C             | V432A      | Benign (1.261)                | TSP type-1 2               | NM_207517.2    |
|                 | 2203 <sup>^</sup> | ABC     | E16  | G2119A             | R632Q      | Benign (0.001)                | inter TSP type 4 and 5     |                |
|                 | 2032              | GCB     | E21  | A3834G             | I1204V     | Benign (0.971)                | none                       |                |
|                 | 2032              | GCB     | E21  | G3603A             | E1127K     | Possibly damaging (1.671)     | none                       |                |
| <i>AKAP8</i>    | 2110              | ABC     | E4   | C267G              | A69G       | Benign (0.168)                | none                       | NM_005858.2    |
|                 | 2027              | GCB     | E14  | C1890T             | T610M      | Benign (0.634)                | none                       |                |
|                 | 2209 <sup>^</sup> | ABC     | E14  | ΔAT(1965-1966)     | H635fs     | Damaging                      | none                       |                |
| <i>C12orf35</i> | 2072              | ABC/NC  | E4   | T2360G             | F649C      | Probably damaging (0.914)     | none                       | NM_018169.3    |
|                 | 2026              | ABC     | E4   | A3237C             | K941N      | Benign (0.02)                 | none                       |                |
|                 | 2026              | ABC     | E4   | A3259C             | N949H      | Possibly damaging (0.553)     | none                       |                |
|                 | 2203 <sup>^</sup> | ABC     | E4   | C4030T             | Q1206X     | Damaging                      | none                       |                |
| <i>CCND3</i>    | 2163 <sup>^</sup> | ABC     | E5   | C1015T             | P284S      | Possibly damaging (1.8)       | none                       | NM_001760.3    |
|                 | 2075              | GCB     | E5   | C943T              | Q260X      | Damaging                      | none                       |                |
|                 | 2209 <sup>^</sup> | ABC     | E6   | T1024A             | I290K      | Benign (0.028)                | none                       |                |
| <i>CD36</i>     | 2016              | ABC     | E7   | T778C              | F135L      | Benign (0.5)                  | Extracellular domain       | NM_001001547.2 |
|                 | 2158              | GCB     | E7   | T778C              | F135L      | Benign (0.5)                  | Extracellular domain       |                |
|                 | 2203 <sup>^</sup> | ABC     | E8   | C965A              | T197K      | Benign (0.005)                | Extracellular domain       |                |
|                 | 2126              | GCB     | E8   | G943T              | V190F      | Possibly damaging (0.480)     | Extracellular domain       |                |
|                 | 2043              | ABC     | E11  | A1154G             | K260R      | Probably damaging (0.997)     | Extracellular domain       |                |
|                 | 2012              | GCB     | E12  | T1364C             | I330T      | Possibly damaging (1.887)     | Extracellular domain       |                |
|                 | 2032              | GCB     | E12  | A1320C             | E315D      | Benign (0.274)                | Extracellular domain       |                |
| <i>DCHS1</i>    | 2091              | ABC     | E2   | G1734A             | V442I      | Probably damaging (0.994)     | Cadherin 4 domain          | NM_003737.2    |
|                 | 2205 <sup>^</sup> | ABC     | E3   | C2386T             | A659V      | Probably damaging (0.999)     | Cadherin 6 domain          |                |
|                 | 2097              | ABC     | E20  | C8841T             | P2811S     | Probably damaging (0.999)     | Cadherin 26 domain         |                |
| <i>DSC3</i>     | 2020              | GCB     | E7   | A1017C             | T288P      | Possibly damaging (1.623)     | Extracellular, Cadherin 2  | NM_001941.3    |
|                 | 2205 <sup>^</sup> | ABC     | E11  | T1788C             | Y545H      | Possibly damaging (0.443)     | Extracellular, Cadherin 4  |                |
| <i>DUSP27</i>   | 2102              | GCB     | E5   | A2614A             | K872E      | Benign (1.272)                | none                       | NM_001080426.1 |
|                 | 2033              | ABC     | E5   | A1969G             | I657V      | Probably damaging (0.965)     | Ser-rich                   |                |
|                 | 2112 <sup>^</sup> | NC      | E5   | G2529A             | M843I      | Benign (0.377)                | Ser-rich                   |                |
| <i>DPYD</i>     | 2060              | ABC     | E10  | A1060T             | D308V      | Possibly damaging (0.22)      | none                       | NM_000110.3    |
|                 | 2205 <sup>^</sup> | ABC     | E20  | C2452T             | P772L      | Probably damaging (1)         | none                       |                |
| <i>HNF1B</i>    | 2060              | ABC     | E1   | G294T              | V25L       | Possibly damaging (0.555)     | Dimerization               | NM_000458.2    |
|                 | 2016              | ABC     | E1   | T403G              | V61G       | Benign (0.000)                | none                       |                |
|                 | 2203 <sup>^</sup> | ABC     | E2   | C586A              | A122D      | Probably damaging (0.999)     | none                       |                |
|                 | 2027              | GCB     | E3   | G879C              | D220H      | Benign (0.033)                | none                       |                |
|                 | 2016              | ABC     | E7   | T1594G             | V458G      | Probably damaging (0.961)     | none                       |                |
| <i>KLF2</i>     | 2108              | ABC     | E2   | G482C              | G133A      | Benign#                       | Poly-Gly                   | NM_016270.2    |
|                 | 2108              | ABC     | E2   | G568A              | G162S      | Benign#                       | Interaction with WWP1      |                |
|                 | 2205 <sup>^</sup> | ABC     | E3   | G1036A             | E318K      | Probably damaging (0.993)     | Zinc finger C2H2-type 2    |                |

|                |                   |         |      |                      |         |                           |                             |             |
|----------------|-------------------|---------|------|----------------------|---------|---------------------------|-----------------------------|-------------|
| <i>MAGEC3</i>  | 2025              | ABC     | E10c | T1757C               | L586S   | Probably damaging (0.988) | MAGE 2 (456 – 643)          | NM_138702.1 |
|                | 2157              | GCB     | E10b | T1570G               | F524V   | Benign (0.008)            | MAGE 2 (456 – 643)          |             |
|                | 2205 <sup>^</sup> | ABC     | E10b | C1572A               | F524L   | Possibly damaging (0.562) | MAGE 2 (456 – 643)          |             |
| <i>MED12L</i>  | 2137 <sup>^</sup> | GCB     | E31  | C4572T               | R1512W  | Probably damaging (0.995) | none                        | NM_053002.3 |
|                | 2210              | ABC     | E15  | ΔAGA (2274-2276)     | ΔK746   | Unknown                   | none                        |             |
| <i>MYOM2</i>   | 2108              | ABC     | E12  | C1504T               | R456X   | Damaging                  | Fibronectin type-III 1      | NM_003970.2 |
|                | 2110              | ABC     | E12  | C1504T               | R456X   | Damaging                  | Fibronectin type-III 1      |             |
|                | 2057              | GCB     | E15  | G1870T               | G578W   | Probably damaging (1)     | Fibronectin type-III 2      |             |
|                | 2026              | ABC     | E29  | C(-1)T               | K1151fs | Damaging                  | Ig-like C2-type 4           |             |
|                | 2093              | ABC     | E17  | G2216C               | S693T   | Probably damaging (0.997) | Fibronectin type-III 3      |             |
|                | 2044              | ABC     | E18  | C2291T               | T718M   | Probably damaging (1)     | Fibronectin type-III 4      |             |
|                | 2019              | ABC     | E36  | G4166A               | R1343H  | Probably damaging (1)     | none                        |             |
|                | 2034              | ABC     | E37  | C4343T               | T1404I  | Possibly damaging (0.707) | Ig-like C2-type 5           |             |
|                | 2203 <sup>^</sup> | ABC     | E2   | G215A                | R26Q    | Probably damaging (0.997) | none                        |             |
| <i>MTMR8</i>   | 2017              | ABC     | E14  | G1789A               | G574D   | Benign (0.001)            | none                        | NM_017677.2 |
|                | 2203 <sup>^</sup> | ABC     | E9   | G1161T               | G365X   | Damaging                  | Myotubularin phosphatase    |             |
| <i>NOTCH1</i>  | 2132              | ABC     | E34  | ΔCT (7544-7545)      | P2515fs | Damaging                  | PEST domain                 | NM_017617.2 |
|                | 2100              | GCB     | E34  | C7249T               | Q2417X  | Damaging                  | PEST domain                 |             |
| <i>PMS1</i>    | 2093              | ABC     | E9   | T2321A               | L598I   | Benign (0.072)            | DNA binding, HMG box        | NM_000534.4 |
|                | 2209 <sup>^</sup> | non-GCB | E2   | C546T                | A6V     | Possibly damaging (0.484) | none                        |             |
| <i>TLL2</i>    | 2075              | GCB     | E2   | G488A                | V88M    | Benign (0.000)            | Propeptide                  | NM_012465.2 |
|                | 2137 <sup>^</sup> | GCB     | E4   | G649T                | K141N   | Benign (0.001)            | Propeptide                  |             |
|                | 2205 <sup>^</sup> | ABC     | E14  | G2048A               | E608K   | Probably damaging (0.999) | EGF-like 1; calcium-binding |             |
| <i>TRAF3</i>   | 2147              | GCB     | E10  | C1281T               | R310X   | Damaging                  | none                        | NM_145726.1 |
|                | 2174              | ABC     | E5   | C705T                | R118W   | Probably damaging (1)     | TRAF like domain            |             |
| <i>TSC22D1</i> | 2148              | GCB     | E5   | C2776T               | S762L   | Probably damaging (0.794) | Gln-rich                    | NM_183422.2 |
|                | 2203 <sup>^</sup> | ABC     | E5   | G3204A               | A905T   | Possibly damaging (0.940) | none                        |             |
| <i>TMEM30A</i> | 2127              | ABC     | E3   | C690T                | R138X   | Damaging                  | none                        | NM_018247.3 |
|                | 2209 <sup>^</sup> | non-GCB | E2   | T590A                | C104X   | Damaging                  | none                        |             |
|                | 2057              | GCB     | E7   | A1266T               | I330F   | Probably damaging (0.999) | none                        |             |
| <i>ANKLE2</i>  | 2034              | ABC     | E8   | G1583A               | V506I   | Benign (0.001)            | none                        | NM_015114.1 |
|                | 2065              | ABC     | E11  | C2139T               | P691L   | Benign (0.000)            | none                        |             |
|                | 2148              | GCB     | E11  | C2139T               | P691L   | Benign (0.000)            | none                        |             |
|                | 2160              | ABC/NC  | E11  | C2139T               | P691L   | Benign (0.000)            | none                        |             |
| <i>KDM2B</i>   | 2156 <sup>^</sup> | GCB     | E4   | dupl CTGAA (429-432) | P121fs  | Damaging                  | none                        | NM_032590.3 |
|                | 2094              | ABC/NC  | E9   | C1075G               | N334K   | Probably damaging (1.000) | JmjC domain                 |             |
|                | 2027              | GCB     | E14  | G2102C               | E677Q   | Benign (0.015)            | Zinc finger PHD type        |             |
|                | 2137 <sup>^</sup> | GCB     | E23  | C4010T               | Q1313X  | Damaging                  | Repeat LRR 7                |             |

\* Numbering according to the corresponding mRNA and protein RefSeq

<sup>^</sup> For these samples, paired normal DNA was available and confirmed the somatic origin of the mutation

# According to the SIFT prediction algorithm (this mutation was scored as unknown by PolyPhen-2)

Abbreviations: ABC, activated B cell-type; GCB, germinal center B cell type; NC, unclassified; non-GCB, non-Germinal Center type (IHC classification); Δ, deletion; fs, frameshift; dupl, duplication

**Supplementary Table 10. Mutations of the *MLL2* gene in DLBCL**

| Sample ID                               | DLBCL Subtype | Exon | Nucleotide change*          | AA change*   | Affected Domain^^                       |
|-----------------------------------------|---------------|------|-----------------------------|--------------|-----------------------------------------|
| <b>Missense Mutations</b>               |               |      |                             |              |                                         |
| 2089                                    | GCB-DLBCL     | E14  | G4163T (+/+)                | R1388L (+/+) | none                                    |
| 2171                                    | ABC-DLBCL     | E17  | C4517G                      | T1506S       | 5 PHD domain                            |
| DB                                      | GCB-DLBCL     | E23  | C5386T (+/+)                | R1796W (+/+) | none                                    |
| 2057                                    | GCB-DLBCL     | E31  | T7829C                      | L2610P       | none                                    |
| 2136                                    | ABC-DLBCL     | E31  | G7904A                      | R2635Q       | none                                    |
| Ly4                                     | GCB-DLBCL     | E39  | A11849G (+/+)               | Q3950R (+/+) | none                                    |
| 2147                                    | GCB-DLBCL     | E42  | G13976C                     | R4659P       | none                                    |
| 2125                                    | GCB-DLBCL     | E46  | G14395A                     | V4799M       | none                                    |
| 2041                                    | NC-DLBCL      | E48  | T15167C                     | L5056P       | none                                    |
| 2027                                    | GCB-DLBCL     | E48  | T15274A                     | C5092S       | none                                    |
| SUDHL8                                  | GCB-DLBCL     | E51  | A16310G                     | N5437S       | SET domain                              |
| <b>Nonsense Mutations</b>               |               |      |                             |              |                                         |
| SUDHL6                                  | GCB-DLBCL     | E5   | C631T                       | Q211X        | 5 PHD, HMG, PHD, FYRN, FYRC, SET domain |
| 2078                                    | GCB-DLBCL     | E14  | T4212A                      | Y1404X       | 3 PHD, HMG, PHD, FYRN, FYRC, SET domain |
| 2162                                    | ABC/NC-DLBCL  | E20  | G4999T                      | E1667X       | HMG, PHD, FYRN, FYRC, SET domain        |
| Ly1                                     | GCB-DLBCL     | E26  | C5707T                      | R1903X       | HMG, PHD, FYRN, FYRC, SET domain        |
| SUDHL10                                 | GCB-DLBCL     | E31  | C7228T                      | R2410X       | PHD, FYRN, FYRC, SET domain             |
| 2069^                                   | ABC/NC-DLBCL  | E34  | C8458T                      | Q2820X       | PHD, FYRN, FYRC, SET domain             |
| 2192                                    | GCB-DLBCL     | E39  | C11911T                     | Q3971X       | PHD, FYRN, FYRC, SET domain             |
| 2152^                                   | ABC-DLBCL     | E39  | C11962T                     | Q3988X       | PHD, FYRN, FYRC, SET domain             |
| SUDHL6                                  | GCB-DLBCL     | E44  | G14134T                     | E4712X       | PHD, FYRN, FYRC, SET domain             |
| 2195                                    | ABC-DLBCL     | E48  | T15618A                     | Y5206X       | FYRN, FYRC, SET domain                  |
| <b>Frameshift/Splice site Mutations</b> |               |      |                             |              |                                         |
| 2110                                    | ABC-DLBCL     | E6   | $\Delta$ 14bp (777-790)     | L260fs       | 4 PHD, HMG, PHD, FYRN, FYRC, SET domain |
| 2106                                    | GCB-DLBCL     | E7   | insCACTC (935_936)          | H313fs       | 4 PHD, HMG, PHD, FYRN, FYRC, SET domain |
| Ly18                                    | GCB-DLBCL     | E7   | T(+2)GT                     | A319fs       | 4 PHD, HMG, PHD, FYRN, FYRC, SET domain |
| Ly18                                    | GCB-DLBCL     | E10  | $\Delta$ C1940              | P658fs       | 3 PHD, HMG, PHD, FYRN, FYRC, SET domain |
| 2067                                    | GCB-DLBCL     | E13  | $\Delta$ TC (-4)            | V1340fs      | 3 PHD, HMG, PHD, FYRN, FYRC, SET domain |
| 2168                                    | ABC-DLBCL     | E35  | $\Delta$ 10bp (10304-10313) | I3435fs      | PHD, FYRN, FYRC, SET domain             |
| 2127                                    | ABC-DLBCL     | E36  | $\Delta$ CT (10369-10370)   | L3457fs      | PHD, FYRN, FYRC, SET domain             |
| 2157^                                   | GCB-DLBCL     | E36  | insG (10394_10395)          | P3466fs      | PHD, FYRN, FYRC, SET domain             |
| Ly1                                     | GCB-DLBCL     | E48  | $\Delta$ C14782             | P4929fs      | PHD, FYRN, FYRC, SET domain             |
| 2160                                    | GCB-DLBCL     | E48  | $\Delta$ G15133             | P5046fs      | PHD, FYRN, FYRC, SET domain             |
| 2027                                    | GCB-DLBCL     | E48  | $\Delta$ C15546             | G5182fs      | FYRN, FYRC, SET domain                  |
| SUDHL8                                  | GCB-DLBCL     | E48  | $\Delta$ C15546             | G5182fs      | FYRN, FYRC, SET domain                  |

\*Numbering according to GenBank accession No. NM\_003482.3 (mRNA) and NP\_003473.3 (protein) respectively

Mutations affecting intronic sequences within consensus splice sites are indicated by the distance from the corresponding exon

^In this sample, analysis of paired normal DNA confirmed the somatic origin of the mutation

^^Note that none of the missense mutations could be successfully scored by the SIFT and Polyphen-2 algorithms

Abbreviations: ABC, activated B cell-type; GCB, germinal center B cell-type; NC, unclassified;  $\Delta$ , deletion; ins, insertion; fs, frameshift; +/+, hemizygous or homozygous mutation

**Supplementary Table 11. Copy number losses and genomic breaks affecting histone methylation genes in DLBCL**

| Gene Symbol  | Sample ID | Chr | Cytoband            | Start position <sup>^</sup> | End position <sup>^</sup> | Seg.mean | Seg. observed CN | Size (Kb)  | Aberration       | N of Genes | Genes                      |
|--------------|-----------|-----|---------------------|-----------------------------|---------------------------|----------|------------------|------------|------------------|------------|----------------------------|
| <b>MLL3</b>  | 2201      | 7   | 7q36.1              | 151478879                   | 151980320                 | -0.5497  | 1.37             | 501.441    | loss             | 2          | MLL3 XRCC2                 |
|              | 2124      | 7   | 7q36.1 - 7q36.3     | 148747000                   | 158820000                 | -0.2331  | 1.70             | 10073.000  | loss (subclonal) | 68         | MLL3 and 67 other genes    |
|              | 2204      | 7   | 7q33 - 7q36.2       | 134215887                   | 153251193                 | -0.52327 | 1.40             | 19035.306  | loss             | 176        | MLL3 and 175 other genes   |
|              | 2168      | 7   | 7q32.3 - 7q36.3     | 130669532                   | 158819753                 | -0.3754  | 1.54             | 28150.221  | loss             | 190        | MLL3 and 189 other genes   |
|              | 2151      | 7   | 7q32.1 - 7q36.1     | 127457093                   | 151504219                 | 0.4188   | 2.67             | 24047.126  | gain/breakpoint  | 204        | MLL3 and >200 other genes  |
| <b>MLL5</b>  | 2025      | 7   | 7q22.2              | 104431254                   | 104805720                 | -0.6521  | 1.27             | 374.466    | loss             | 2          | MLL5 SRPK2                 |
|              | 2168      | 7   | 7p13 - 7q22.2       | 44647000                    | 105575241                 | -0.3865  | 1.53             | 60928.241  | loss             | 318        | MLL5 and >200 other genes  |
| <b>MLL</b>   | 2126      | 11  | 11p15.5 - 11q23.3   | 188510                      | 117880221                 | 0.6330   | 3.10             | 117691.711 | gain/breakpoint  | 1076       | MLL and >200 other genes   |
| <b>KDM2B</b> | 2157      | 12  | 12q24.31            | 120430813                   | 120550171                 | -0.6175  | 1.30             | 119.358    | loss             | 2          | KDM2B ORAI1                |
|              | 2180      | 12  | 12q24.31            | 120267091                   | 120754295                 | -0.6723  | 1.26             | 487.204    | loss             | 7          | KDM2B and 6 other genes    |
|              | 2176      | 12  | 12q24.31            | 119623368                   | 122061907                 | -0.5864  | 1.33             | 2438.539   | loss             | 42         | KDM2B and 41 other genes   |
|              | 2194      | 12  | 12q24.31            | 119223646                   | 121827176                 | -0.5786  | 1.34             | 2603.530   | loss             | 48         | KDM2B and 47 other genes   |
|              | 2135      | 12  | 12q23.2 - 12q24.33  | 102104106                   | 129246565                 | -0.8973  | 1.07             | 27142.459  | loss             | 214        | KDM2B and >200 other genes |
|              | 2196      | 12  | 12q23.1 - 12q24.33  | 94841355                    | 132288250                 | -0.2269  | 1.71             | 37446.895  | loss (subclonal) | 279        | KDM2B and >200 other genes |
|              | 2162      | 12  | 12p13.33 - 12q24.33 | 20691                       | 132288250                 | -0.2418  | 1.69             | 132267.559 | loss (subclonal) | 1085       | KDM2B and >200 other genes |

<sup>^</sup> Numbering according to the Human Genome hg18 assembly

**Supplementary Table 12. Mutations of the *B2M* gene in DLBCL**

| Sample ID         | Subtype   | Allele** | Status  | Exon    | Nucleotide change*    | AA change*       | Functional consequences   | PolyPhen-2 prediction (score) |
|-------------------|-----------|----------|---------|---------|-----------------------|------------------|---------------------------|-------------------------------|
| 2038              | GCB-DLBCL | A        | M       | E1      | T62A                  | M1K              | No translation initiation | Possibly damaging (0.564)     |
|                   |           | B        | M       | E1      | T80C                  | L7S              | Unknown                   | Benign (0.076)                |
| 2075              | GCB-DLBCL | A        | M       | E1      | T62G                  | M1R              | No translation initiation | Possibly damaging (0.733)     |
|                   |           | B        | G       | na      | -                     | -                | -                         | -                             |
| 2100              | GCB-DLBCL | A        | M       | E1      | T62A                  | M1K              | No translation initiation | Possibly damaging (0.564)     |
|                   |           | B        | unknown | unknown |                       |                  |                           |                               |
| 2138              | GCB-DLBCL | A        | M       | E1      | T62G                  | M1R              | No translation initiation | Possibly damaging (0.733)     |
|                   |           | B        | G       | na      | -                     | -                | -                         | -                             |
| 2156 <sup>^</sup> | GCB-DLBCL | A        | M       | E1      | G82A, T309G           | A8T, Y83X        | Truncated protein         | nd                            |
|                   |           | B        | M       | E2      | G(+1)A                | R23fs            | Truncated protein         | nd                            |
| 2171              | ABC-DLBCL | A        | M       | E1      | ΔGCGCTACTCTC (91-101) | L11fs            | Truncated protein         | nd                            |
|                   |           | B        | M       | E2      | A245C                 | N62T             | Unknown                   | Probably damaging (0.997)     |
| 2183              | ABC-DLBCL | A        | M       | E1      | ΔCT (97-98)           | L15fs            | Truncated protein         | nd                            |
|                   |           | B        | unknown | unknown |                       |                  |                           |                               |
| 2110              | ABC-DLBCL | A        | M       | E1      | ΔCT (103-104)         | L14fs            | Truncated protein         | nd                            |
|                   |           | B        | G       | na      | -                     | -                | -                         | -                             |
| 2209 <sup>^</sup> | non-GCB   | A        | M       | E1      | T(+2)A                | R23fs            | Truncated protein         | nd                            |
|                   |           | B        | G       | na      | -                     | -                | -                         | -                             |
| Ly1               | GCB-DLBCL | A        | M       | E1      | T62C                  | M1T              | No translation initiation | Possibly damaging (0.564)     |
|                   |           | B        | M       | E2      | T352A                 | Y98N             |                           | Probably damaging (1.0)       |
| 2033              | ABC-DLBCL | A        | M       | E2      | G299A                 | W80X             | Truncated protein         | nd                            |
|                   |           | B        | D       | E1-3    | na                    | na               | Allelic loss              |                               |
| 2089              | GCB-DLBCL | A        | M       | E2      | Δ42bp (239-280)       | L60fs            | Truncated protein         | nd                            |
|                   |           | B        | D       | na      | na                    | na               | Allelic loss              |                               |
| 2148              | GCB-DLBCL | A        | M       | E2      | C318G, C271A, T304G   | H71N, F82V, Y86X | Truncated protein         | nd                            |
|                   |           | B        | G       | na      | -                     | -                | -                         | -                             |
| WSU               | GCB-DLBCL | A        | M       | E1      | ΔGGCCGAGATG (54-63)   | ΔM1              | No translation initiation | nd                            |
|                   |           | B        | D       | E1-3    | na                    | na               | Allelic loss              |                               |
| 2152              | ABC-DLBCL | A        | M       | E2      | insA (345-346)        | D96fs            | Truncated protein         | nd                            |
|                   |           | B        | unknown | unknown |                       |                  |                           |                               |
| 2161              | GCB-DLBCL | A        | M       | E2      | insT (239-240)        | K61fs            | Truncated protein         | nd                            |
|                   |           | B        | G       | na      | -                     | -                |                           |                               |
| SUDHL2            | ABC-DLBCL | A        | M       | E2      | T193G                 | C45G             | Unknown                   | Probably damaging (0.967)     |
|                   |           | B        | D       | E1-3    | na                    | na               | Allelic Loss              |                               |

\* Numbering according to GenBank accession No. NM\_004048 (mRNA) and NP\_004039.1 (protein) respectively

<sup>^</sup> For these samples, paired normal DNA was available and confirmed the somatic origin of the mutation

\*\* In cases carrying multiple sequence variants, the allelic distribution of the mutations was formally proven by cloning and sequencing PCR products encompassing the various changes; in primary cases where no copy number data were available, the status of the second allele is given as unknown

Abbreviations: ABC, activated B cell-type; GCB, germinal center B cell-type; Δ, deletion; fs, frameshift; ins, insertion; na, not applicable; M, mutated; D, deleted; G, germline; nd, not determined (The PolyPhen-2 algorithm predicts only the impact of amino acid substitutions; note that in cases carrying multiple mutations within the same allele, only the nonsense mutation is considered)

**Supplementary Table 13. Copy number losses of the *B2M* gene in DLBCL**

| Sample ID | Chr | Cytoband          | Start position <sup>^</sup> | End position <sup>^</sup> | Seg.mean | Seg. observed CN | Size (Kb) | Aberration                 | N of Genes | Genes                    |
|-----------|-----|-------------------|-----------------------------|---------------------------|----------|------------------|-----------|----------------------------|------------|--------------------------|
| 2126      | 15  | 15q21.1           | 42771402                    | 42801338                  | -2.7261  | 0.30             | 29.936    | loss homozygous            | 1          | B2M                      |
| 2019      | 15  | 15q21.1           | 42761080                    | 42824209                  | -0.8982  | 1.07             | 63.129    | loss                       | 2          | B2M TRIM69               |
| 2094      | 15  | 15q21.1           | 42717188                    | 42796158                  | -1.5882  | 0.67             | 78.970    | loss homozygous            | 2          | B2M SPG11                |
| 2101      | 15  | 15q21.1           | 42736553                    | 42792673                  | -1.3642  | 0.78             | 56.120    | loss homozygous            | 2          | B2M SPG11                |
| 2101      | 15  | 15q21.1 - 15q21.2 | 42792952                    | 48353000                  | -0.6927  | 1.24             | 5560.048  | loss                       | 34         | B2M and 33 other genes   |
| 2165      | 15  | 15q21.1           | 42789067                    | 42843504                  | -1.6319  | 0.65             | 54.437    | loss homozygous            | 2          | B2M TRIM69               |
| 2180      | 15  | 15q15.3 - 15q21.1 | 42695657                    | 42807609                  | -1.8679  | 0.55             | 111.952   | loss homozygous            | 2          | B2M SPG11                |
| 2147      | 15  | 15q21.1           | 42718127                    | 42849292                  | -1.5344  | 0.69             | 131.165   | loss homozygous            | 3          | B2M SPG11 TRIM69         |
| 2176      | 15  | 15q15.3 - 15q21.1 | 42663754                    | 42831204                  | -2.0990  | 0.47             | 167.450   | loss homozygous            | 3          | B2M SPG11 TRIM69         |
| 2033      | 15  | 15q15.3 - 15q21.1 | 42635102                    | 42831204                  | -1.0865  | 0.94             | 196.102   | loss                       | 4          | B2M EIF3J SPG11 TRIM69   |
| 2195      | 15  | 15q15.3 - 15q21.1 | 41938355                    | 42814441                  | -0.8182  | 1.13             | 876.086   | loss                       | 7          | B2M and 6 other genes    |
| 2089      | 15  | 15q15.1 - 15q21.1 | 40127344                    | 44171662                  | -0.6393  | 1.28             | 4044.318  | loss                       | 57         | B2M and 56 other genes   |
| 2168      | 15  | 15q15.1 - 15q21.1 | 38888416                    | 43088136                  | -1.3992  | 0.76             | 4199.720  | loss homozygous            | 70         | B2M and 69 other genes   |
| 2184      | 15  | 15q14 - 15q21.2   | 36854077                    | 48291699                  | -0.7589  | 1.18             | 11437.622 | loss                       | 125        | B2M and 124 other genes  |
| 2194      | 15  | 15q12 - 15q21.1   | 25114232                    | 46089975                  | -0.6471  | 1.28             | 20975.743 | loss                       | 156        | B2M and 155 other genes  |
| 2034      | 15  | 15q11.2 - 15q21.2 | 20303872                    | 50060564                  | -0.5851  | 1.33             | 29756.692 | loss                       | 203        | B2M and >200 other genes |
| 2124      | 15  | 15q11.2 - 15q22.2 | 20232602                    | 58570000                  | -0.2416  | 1.69             | 38337.398 | loss (long arm, subclonal) | 247        | B2M and >200 other genes |
| 2122      | 15  | 15q11.2 - 15q26.3 | 20224751                    | 100286551                 | -0.2423  | 1.69             | 80061.800 | loss (long arm, subclonal) | 539        | B2M and >200 other genes |
| 2192      | 15  | 15q11.2 - 15q26.3 | 20073110                    | 100286551                 | -0.2116  | 1.73             | 80213.441 | loss (long arm, subclonal) | 539        | B2M and >200 other genes |
| 2196      | 15  | 15q11.2 - 15q26.3 | 20224751                    | 100286551                 | -0.2066  | 1.73             | 80061.800 | loss (long arm, subclonal) | 539        | B2M and >200 other genes |
| 2025      | 15  | 15q11.1 - 15q26.3 | 18276329                    | 100286551                 | -0.6675  | 1.26             | 82010.222 | loss (long arm)            | 727        | B2M and >200 other genes |

<sup>^</sup> Numbering according to the Human Genome hg18 assembly

**Supplementary Table 14. Mutations of the CD58 gene in DLBCL**

| Sample ID         | Subtype   | Allele | Status** | Exon    | Nucleotide change*              | AA change* | Functional consequences |
|-------------------|-----------|--------|----------|---------|---------------------------------|------------|-------------------------|
| 2138 <sup>^</sup> | GCB-DLBCL | A      | M        | E3      | G611T                           | E164X      | Truncated protein       |
|                   |           | B      | G        | na      | -                               | -          | -                       |
| 2026              | ABC-DLBCL | A      | M        | E2      | ΔTAT (476-478)                  | ΔY119      | Unknown                 |
|                   |           | B      | unknown  | unknown |                                 |            |                         |
| 2072              | NC-DLBCL  | A      | M        | E2      | ΔTTCT (467-470)                 | F116fs     | Truncated protein       |
|                   |           | B      | unknown  | unknown |                                 |            |                         |
| 2038              | GCB-DLBCL | A      | M        | E2      | ΔTG (376-377)                   | V86fs      | Truncated protein       |
|                   |           | B      | unknown  | unknown |                                 |            |                         |
| 2156 <sup>^</sup> | GCB-DLBCL | A      | M        | E2      | ΔGGTTTATTTAGACACTGTGT (361-380) | R80fs      | Truncated protein       |
|                   |           | B      | M        | E3      | insA (519-520)                  | C134fs     | Truncated protein       |
| 2108              | ABC-DLBCL | A      | M        | E3      | insG (535-536)                  | E139fs     | Truncated protein       |
|                   |           | B      | unknown  | unknown |                                 |            |                         |

\* Numbering according to GenBank accession No. NM\_001779.2 (mRNA) and NP\_001770.1 (protein) respectively

<sup>^</sup> For these samples, paired normal DNA was available and confirmed the somatic origin of the mutation

\*\* In cases carrying multiple sequence variants, the allelic distribution of the mutations was formally proven by cloning and sequencing PCR products encompassing the various changes; in cases where no copy number data were available, the status of the second allele is given as unknown

Abbreviations: ABC, activated B cell-type; GCB, germinal center B cell-type; NC, unclassified; Δ, deletion; fs, frameshift; ins, insertion



**Supplementary Table 15. Copy number losses of the CD58 gene in DLBCL**

| Sample ID | Chr | Cytoband         | Start position^ | End position^ | Seg.mean | Seg. observed CN | Size (Kb)  | Aberration      | N of Genes | Genes                               |
|-----------|-----|------------------|-----------------|---------------|----------|------------------|------------|-----------------|------------|-------------------------------------|
| 2025      | 1   | 1p13.1           | 116864186       | 116914082     | -2.6735  | 0.31             | 49.896     | loss homozygous | 1          | CD58                                |
| 2163      | 1   | 1p13.1           | 116844399       | 116889302     | -0.7329  | 1.20             | 44.903     | loss            | 1          | CD58                                |
| 2204      | 1   | 1p13.1           | 116883520       | 116981713     | -1.164   | 1.03             | 98.193     | loss            | 2          | CD58 IGSF3                          |
| 2141      | 1   | 1p13.1           | 116868616       | 116931567     | -2.1374  | 0.45             | 62.951     | loss homozygous | 2          | CD58 IGSF3                          |
| 2141      | 1   | 1p13.1           | 116478246       | 116864186     | -0.5539  | 1.36             | 385.940    | loss            | 3          | ATP1A1 C1orf161 CD58                |
| 2176      | 1   | 1p13.1           | 116879075       | 116988908     | -1.9606  | 0.51             | 109.833    | loss homozygous | 2          | CD58 IGSF3                          |
| 2176      | 1   | 1p13.2 - 1p13.1  | 111686452       | 116878070     | -0.7087  | 1.22             | 5191.618   | loss            | 48         | CD58 and 47 other genes             |
| 2136      | 1   | 1p13.1           | 116197766       | 117071909     | -0.5349  | 1.38             | 874.143    | loss            | 5          | ATP1A1 C1orf161 CD58 IGSF3 SLC22A15 |
| 2165      | 1   | 1p13.2 - 1p13.1  | 115016588       | 117187099     | -0.6783  | 1.25             | 2170.511   | loss            | 17         | CD58 and 16 other genes             |
| 2015      | 1   | 1p13.2 - 1p12    | 115801000       | 118589000     | -0.3382  | 1.58             | 2788.000   | loss            | 19         | CD58 and 18 other genes             |
| 2034      | 1   | 1p13.3 - 1p11.2  | 109562000       | 121041748     | -0.4626  | 1.45             | 11479.748  | loss            | 115        | CD58 and 114 other genes            |
| 2168      | 1   | 1p36.11 - 1q21.1 | 24087544        | 143553903     | -0.3839  | 1.53             | 119466.359 | loss            | 726        | CD58 and >200 other genes           |
| 2135      | 1   | 1p13.2 - 1q44    | 114498544       | 247190999     | -0.4290  | 1.49             | 132692.455 | loss            | 974        | CD58 and >200 other genes           |
| 2032      | 1   | 1p36.33 - 1p11.2 | 218557          | 120832474     | -0.3981  | 1.52             | 120613.917 | loss            | 1019       | CD58 and >200 other genes           |
| 2033      | 1   | 1p36.33 - 1p11.2 | 51586           | 121045307     | -0.3335  | 1.59             | 120993.721 | loss            | 1020       | CD58 and >200 other genes           |

^ Numbering according to the Human Genome hg18 assembly

**Supplementary Table 16. Copy number losses of the *TNFSF9* gene in DLBCL**

| Sample ID | Chr | Cytoband           | Start position^ | End position^ | Seg.mean | Seg. observed CN | Size (Kb) | Aberration               | N of Genes | Genes                       |
|-----------|-----|--------------------|-----------------|---------------|----------|------------------|-----------|--------------------------|------------|-----------------------------|
| 2101      | 19  | 19p13.3            | 6475406         | 6529028       | -1.3442  | 0.79             | 53.622    | loss homozygous          | 1          | TNFSF9                      |
| 2025      | 19  | 19p13.3            | 6378364         | 6529028       | -2.2145  | 0.43             | 150.664   | loss homozygous          | 6          | TNFSF9 and 5 other genes    |
| 2032      | 19  | 19p13.3            | 6473782         | 6720475       | -0.9985  | 1.00             | 246.693   | loss                     | 7          | TNFSF9 and 6 other genes    |
| 2194      | 19  | 19p13.3 - 19p13.2  | 6089027         | 7978919       | -0.5320  | 1.38             | 1889.892  | loss                     | 49         | TNFSF9 and 48 other genes   |
| 2168      | 19  | 19p13.3 - 19p13.2  | 6150971         | 8115572       | -1.3811  | 0.77             | 1964.601  | loss homozygous          | 50         | TNFSF9 and 49 other genes   |
| 2182      | 19  | 19p13.3 - 19p13.2  | 6353648         | 9507586       | -0.6219  | 1.30             | 3153.938  | loss                     | 76         | TNFSF9 and 75 other genes   |
| 2034      | 19  | 19p13.3 - 19q12    | 4064312         | 32458000      | -0.3557  | 1.56             | 28393.688 | loss                     | 442        | TNFSF9 and >200 other genes |
| 2019      | 19  | 19p13.3 - 19p12    | 41898           | 24252646      | -0.2231  | 1.71             | 24210.748 | loss                     | 578        | TNFSF9 and >200 other genes |
| 2046      | 19  | 19p13.3 - 19q13.31 | 214395          | 48344501      | -0.2759  | 1.65             | 48130.106 | loss                     | 835        | TNFSF9 and >200 other genes |
| 2135      | 19  | 19p13.3 - 19q13.43 | 41898           | 63789654      | -0.3707  | 1.55             | 63747.756 | loss (entire chromosome) | 1518       | TNFSF9 and >200 other genes |

^ Numbering according to the Human Genome hg18 assembly

**Supplementary Table 17. Copy number gains affecting genes involved in B cell differentiation in DLBCL**

| Gene Symbol | Sample ID   | Chr             | Cytoband          | Start position <sup>^</sup> | End position <sup>^</sup> | Seg.mean | Seg. observed CN | Size (Kb)                | Aberration               | N of Genes                | Genes                     |
|-------------|-------------|-----------------|-------------------|-----------------------------|---------------------------|----------|------------------|--------------------------|--------------------------|---------------------------|---------------------------|
| <b>PAX5</b> | 2147        | 9               | 9p13.2            | 36837139                    | 37027976                  | 0.5906   | 3.01             | 190.837                  | gain                     | 1                         | PAX5                      |
|             | 2182        | 9               | 9p13.3 - 9p13.2   | 35989466                    | 37630824                  | 1.0339   | 4.10             | 1641.358                 | amp                      | 14                        | PAX5 and 13 other genes   |
|             | 2020        | 9               | 9p13.3 - 9p13.2   | 35124375                    | 37891883                  | 1.0493   | 4.14             | 2767.508                 | amp                      | 42                        | PAX5 and 41 other genes   |
|             | 2151        | 9               | 9p21.1 - 9p13.2   | 32426000                    | 37237137                  | 0.2153   | 2.32             | 4811.137                 | gain                     | 80                        | PAX5 and 79 other genes   |
|             | 2171        | 9               | 9p21.3 - 9p13.1   | 22103895                    | 39332563                  | 0.4742   | 2.78             | 17228.668                | gain                     | 107                       | PAX5 and 106 other genes  |
|             | 2168        | 9               | 9p21.3 - 9p12     | 22016992                    | 40572694                  | 0.4481   | 2.73             | 18555.702                | gain                     | 110                       | PAX5 and 109 other genes  |
|             | 2019        | 9               | 9p21.3 - 9q13     | 22474702                    | 70301266                  | 0.2572   | 2.39             | 47826.564                | gain                     | 128                       | PAX5 and 127 other genes  |
|             | 2034        | 9               | 9p21.3 - 9q13     | 21989228                    | 70133638                  | 1.7990   | 6.96             | 48144.41                 | amp                      | 129                       | PAX5 and 128 other genes  |
|             | 2023        | 9               | 9p24.1 - 9p11.2   | 5571140                     | 44190837                  | 0.6546   | 3.15             | 38619.697                | gain                     | 177                       | PAX5 and 176 other genes  |
|             | 2162        | 9               | 9p24.3 - 9p12     | 30910                       | 41942504                  | 0.2459   | 2.37             | 41911.594                | gain                     | 203                       | PAX5 and >200 other genes |
|             | 2089        | 9               | 9p24.3 - 9p11.2   | 30910                       | 43054830                  | 1.3602   | 5.13             | 43023.92                 | amp                      | 207                       | PAX5 and >200 other genes |
|             | 2172        | 9               | 9p24.3 - 9q22.31  | 30910                       | 93978334                  | 0.5258   | 2.88             | 93947.424                | gain                     | 302                       | PAX5 and >200 other genes |
|             | 2094        | 9               | 9p24.3 - 9q33.2   | 30910                       | 123808552                 | 0.4341   | 2.70             | 123777.642               | gain                     | 483                       | PAX5 and >200 other genes |
|             | 2135        | 9               | 9p21.2 - 9q34.3   | 26148371                    | 140194638                 | 0.4591   | 2.75             | 114046.267               | gain                     | 657                       | PAX5 and >200 other genes |
|             | 2101        | 9               | 9p21.3 - 9q34.3   | 22072569                    | 140211203                 | 0.6971   | 3.24             | 118138.634               | gain                     | 660                       | PAX5 and >200 other genes |
|             | 2112        | 9               | 9p21.3 - 9q34.3   | 22001477                    | 140211203                 | 0.3944   | 2.63             | 118209.726               | gain                     | 660                       | PAX5 and >200 other genes |
|             | 2165        | 9               | 9p24.1 - 9q34.3   | 5805583                     | 140211203                 | 0.4802   | 2.79             | 134405.62                | gain                     | 717                       | PAX5 and >200 other genes |
|             | 2181        | 9               | 9p24.3 - 9q34.3   | 30910                       | 140211203                 | 0.2655   | 2.40             | 140180.293               | gain (entire chromosome) | 746                       | PAX5 and >200 other genes |
|             | <b>IRF4</b> | 2110            | 6                 | 6p25.3                      | 327897                    | 418248   | 0.4673           | 2.77                     | 90.351                   | gain                      | 1                         |
| 2124        |             | 6               | 6p25.3 - 6p24.1   | 94649                       | 11698000                  | 0.3057   | 2.47             | 11603.351                | gain                     | 62                        | IRF4 and 61 other genes   |
| 2163        |             | 6               | 6p25.3 - 6p23     | 94649                       | 15355372                  | 0.5957   | 3.02             | 15260.723                | gain                     | 76                        | IRF4 and 75 other genes   |
| 2192        |             | 6               | 6p25.3 - 6p22.2   | 94649                       | 25962000                  | 0.3023   | 2.47             | 25867.351                | gain                     | 116                       | IRF4 and 115 other genes  |
| 2017        |             | 6               | 6p25.3 - 6p21.33  | 94649                       | 30897673                  | 0.4510   | 2.73             | 30803.024                | gain                     | 252                       | IRF4 and >200 other genes |
| 2157        |             | 6               | 6p25.3 - 6p21.32  | 94649                       | 32968730                  | 0.5719   | 2.97             | 32874.081                | gain                     | 344                       | IRF4 and >200 other genes |
| 2162        |             | 6               | 6p25.3 - 6p21.1   | 94649                       | 41778611                  | 0.3228   | 2.50             | 41683.962                | gain                     | 456                       | IRF4 and >200 other genes |
| 2172        |             | 6               | 6p25.3 - 6p21.1   | 94649                       | 42113427                  | 1.0594   | 4.17             | 42018.778                | amp                      | 464                       | IRF4 and >200 other genes |
| 2144        |             | 6               | 6p25.3 - 6p12.3   | 94649                       | 45521325                  | 1.0511   | 4.14             | 45426.676                | amp                      | 521                       | IRF4 and >200 other genes |
| 2173        |             | 6               | 6p25.3 - 6p12.3   | 94649                       | 46237643                  | 0.2112   | 2.32             | 46142.994                | gain                     | 524                       | IRF4 and >200 other genes |
| 2196        |             | 6               | 6p25.3 - 6p12.1   | 94649                       | 56967000                  | 0.1714   | 2.25             | 56872.351                | gain                     | 582                       | IRF4 and >200 other genes |
| 2112        |             | 6               | 6p25.3 - 6q12     | 94649                       | 65204103                  | 0.7713   | 3.41             | 65109.454                | gain                     | 591                       | IRF4 and >200 other genes |
| 2041        |             | 6               | 6p25.3 - 6q14.1   | 247294                      | 77300412                  | 0.4619   | 2.75             | 77053.118                | gain                     | 621                       | IRF4 and >200 other genes |
| <b>ETS1</b> | 2196        | 11              | 11q24.2 - 11q24.3 | 127277784                   | 128406451                 | 0.8661   | 3.65             | 1128.667                 | gain                     | 7                         | ETS1 and 6 other genes    |
|             | 2127        | 11              | 11q23.3 - 11q24.3 | 118011767                   | 127836821                 | 0.2576   | 2.39             | 9825.054                 | gain                     | 110                       | ETS1 and 109 other genes  |
|             | 2025        | 11              | 11q23.3 - 11q25   | 117413538                   | 134449982                 | 0.6231   | 3.08             | 17036.444                | gain                     | 154                       | ETS1 and 153 other genes  |
|             | 2094        | 11              | 11q22.3 - 11q24.3 | 107643213                   | 129097547                 | 0.4949   | 2.82             | 21454.334                | gain                     | 204                       | ETS1 and >200 other genes |
|             | 2168        | 11              | 11q23.1 - 11q25   | 110198401                   | 134449982                 | 0.6088   | 3.05             | 24251.581                | gain                     | 215                       | ETS1 and >200 other genes |
|             | 2180        | 11              | 11q22.3 - 11q24.3 | 105812443                   | 129117874                 | 0.9738   | 3.93             | 23305.431                | gain                     | 215                       | ETS1 and >200 other genes |
|             | 2034        | 11              | 11q22.3 - 11q25   | 107654049                   | 134449982                 | 0.2933   | 2.45             | 26795.933                | gain                     | 225                       | ETS1 and >200 other genes |
|             | 2195        | 11              | 11q22.1 - 11q25   | 100154156                   | 134449982                 | 0.8872   | 3.70             | 34295.826                | gain                     | 269                       | ETS1 and >200 other genes |
|             | 2141        | 11              | 11q14.2 - 11q24.3 | 87496474                    | 128435255                 | 0.5980   | 3.03             | 40938.781                | gain                     | 288                       | ETS1 and >200 other genes |
|             | 2032        | 11              | 11q14.3 - 11q25   | 89597951                    | 134449982                 | 0.3041   | 2.47             | 44852.031                | gain                     | 299                       | ETS1 and >200 other genes |
|             | 2046        | 11              | 11q14.2 - 11q25   | 87309810                    | 134449982                 | 0.4809   | 2.79             | 47140.172                | gain                     | 310                       | ETS1 and >200 other genes |
|             | 2097        | 11              | 11q14.2 - 11q25   | 86466000                    | 134449982                 | 0.2314   | 2.35             | 47983.982                | gain                     | 311                       | ETS1 and >200 other genes |
|             | 2201        | 11              | 11q14.2 - 11q25   | 86490476                    | 134429213                 | 0.4104   | 2.66             | 47938.737                | gain                     | 311                       | ETS1 and >200 other genes |
|             | 2015        | 11              | 11q14.1 - 11q25   | 81644000                    | 134449982                 | 0.2622   | 2.40             | 52805.982                | gain                     | 332                       | ETS1 and >200 other genes |
|             | 2144        | 11              | 11q13.4 - 11q25   | 74640094                    | 134449982                 | 0.4708   | 2.77             | 59809.888                | gain                     | 367                       | ETS1 and >200 other genes |
|             | 2122        | 11              | 11q13.3 - 11q25   | 70230704                    | 134449982                 | 0.5345   | 2.90             | 64219.278                | gain                     | 419                       | ETS1 and >200 other genes |
|             | 2043        | 11              | 11q13.2 - 11q25   | 67734671                    | 134449982                 | 0.4338   | 2.70             | 66715.311                | gain                     | 442                       | ETS1 and >200 other genes |
|             | 2075        | 11              | 11p15.5 - 11q25   | 188510                      | 134449982                 | 0.4288   | 2.69             | 134261.472               | gain (entire chromosome) | 1218                      | ETS1 and >200 other genes |
|             | 2140        | 11              | 11p15.5 - 11q25   | 188510                      | 134449982                 | 0.5916   | 3.01             | 134261.472               | gain (entire chromosome) | 1218                      | ETS1 and >200 other genes |
| 2182        | 11          | 11p15.5 - 11q25 | 188510            | 134449982                   | 0.5038                    | 2.84     | 134261.472       | gain (entire chromosome) | 1218                     | ETS1 and >200 other genes |                           |

<sup>^</sup> Numbering according to the Human Genome hg18 assembly

**Supplementary Table 18. Mutations of the *MEF2B* gene in DLBCL**

| Sample ID | Subtype   | Exon | Nucleotide change* | AA change* | Affected Domain | PolyPhen-2 prediction (score) |
|-----------|-----------|------|--------------------|------------|-----------------|-------------------------------|
| 2026      | ABC-DLBCL | E3   | G343A              | E77K       | MEF2 domain     | Possibly damaging (0.849)     |
| 2034      | ABC-DLBCL | E3   | C348G              | S78R       | MEF2 domain     | Benign (0.39)                 |
| 2125      | GCB-DLBCL | E3   | T275C              | L54P       | MADS box        | Probably damaging (1.0)       |
| 2144      | GCB-DLBCL | E3   | C226A              | L38I       | MADS box        | Probably damaging (1.0)       |
| 2127      | ABC-DLBCL | E5   | C625T              | R171X      | TAD2, C-term    | nd                            |
| 2073      | GCB-DLBCL | E6   | G734A              | R207Q      | TAD1            | Probably damaging (0.999)     |
| 2162      | ABC-DLBCL | E7   | G851A              | G246E      | none            | unknown**                     |
| 2109      | GCB-DLBCL | E8   | Δ(908-938)         | P267fs     | TAD2, C-term    | nd                            |
| Ly4       | GCB-DLBCL | E4   | G428A              | G105E      | none            | Probably damaging (1.0)       |
| SUDHL4    | GCB-DLBCL | E3   | A362T              | D83V       | MEF2 domain     | Probably damaging (0.999)     |

\* Numbering according to GenBank accession No. NM\_001145785.1 (mRNA) and NP\_001139257.1 (protein), corresponding to the MEF2B isoform a.

\*\* The algorithm could not compute a score for this change, in both isoforms of the MEF2B protein

Abbreviations: ABC, activated B cell-type; GCB, germinal center B cell-type; Δ, deletion; fs, frameshift; nd, not determined (the PolyPhen-2 algorithm predicts only the impact of amino acid substitutions)

**Supplementary Table 19. Mutation analysis of common targets of genetic lesions in DLBCL cell lines**

| Sample ID | Subtype | Gene Symbol          |       |       |        |       |                     |                    |      |      |       |      |                    |     |  |
|-----------|---------|----------------------|-------|-------|--------|-------|---------------------|--------------------|------|------|-------|------|--------------------|-----|--|
|           |         | TNFAIP3 <sup>^</sup> | MYD88 | CD79B | CARD11 | TRAF2 | CREBBP <sup>^</sup> | EP300 <sup>^</sup> | EZH2 | MLL2 | MEF2B | CD58 | PRDM1 <sup>^</sup> | B2M |  |
| DB        | GCB     | WT                   | WT    | WT    | WT     | WT    | WT                  | m                  | WT   | m    | WT    | WT   | WT                 | WT  |  |
| LY18      | GCB     | ND                   | WT    | WT    | ND     | ND    | WT                  | WT                 | WT   | M/M  | WT    | WT   | WT                 | WT  |  |
| LY1       | GCB     | WT                   | WT    | WT    | WT     | WT    | M                   | WT                 | m    | M/M  | WT    | WT   | WT                 | m/m |  |
| LY4       | GCB     | WT                   | WT    | WT    | WT     | WT    | WT                  | WT                 | WT   | m    | m     | WT   | WT                 | WT  |  |
| LY7       | GCB     | WT                   | WT    | WT    | WT     | WT    | WT                  | WT                 | WT   | WT   | WT    | WT   | WT                 | WT  |  |
| LY8       | GCB     | D                    | WT    | WT    | ND     | ND    | m                   | WT                 | WT   | WT   | WT    | WT   | WT                 | WT  |  |
| SUDHL4    | GCB     | WT                   | WT    | WT    | WT     | WT    | WT                  | WT                 | m    | WT   | m     | WT   | WT                 | WT  |  |
| SUDHL5    | GCB     | D                    | WT    | WT    | WT     | m     | D                   | WT                 | WT   | WT   | WT    | WT   | D                  | WT  |  |
| SUDHL6    | GCB     | WT                   | m     | WT    | WT     | WT    | M                   | m                  | m    | M/M  | WT    | WT   | WT                 | WT  |  |
| SUDHL7    | GCB     | WT                   | WT    | WT    | m      | WT    | m/m                 | WT                 | WT   | WT   | WT    | WT   | WT                 | WT  |  |
| SUDHL8    | GCB     | WT                   | WT    | WT    | WT     | WT    | M                   | M/m                | WT   | M/m  | WT    | WT   | WT                 | WT  |  |
| SUDHL10   | GCB     | WT                   | WT    | WT    | WT     | WT    | M                   | m                  | WT   | M    | WT    | WT   | WT                 | WT  |  |
| VAL       | GCB     | m                    | WT    | m     | WT     | WT    | M                   | WT                 | m    | WT   | WT    | WT   | WT                 | WT  |  |
| WSU       | GCB     | WT                   | WT    | WT    | m      | m     | m                   | WT                 | WT   | WT   | WT    | WT   | WT                 | M/D |  |
| RCK8      | ABC/NC  | M/M                  | WT    | WT    | WT     | WT    | WT                  | D*                 | WT   | WT   | WT    | M/D  | WT                 | WT  |  |
| HBL1      | ABC     | WT                   | m     | m     | WT     | WT    | WT                  | WT                 | WT   | WT   | WT    | D/D  | WT                 | WT  |  |
| LY10      | ABC     | D                    | m     | WT    | WT     | WT    | WT                  | WT                 | WT   | WT   | WT    | WT   | M/D                | WT  |  |
| LY3       | ABC     | D                    | m     | WT    | m      | WT    | WT                  | WT                 | WT   | WT   | WT    | WT   | M/D                | WT  |  |
| RIVA      | ABC     | D                    | WT    | WT    | WT     | WT    | M                   | WT                 | WT   | WT   | WT    | WT   | D                  | WT  |  |
| SUDHL2    | ABC     | M/M                  | m     | WT    | WT     | WT    | WT                  | M/D                | WT   | WT   | WT    | WT   | m/D                | m/D |  |
| U2932     | ABC     | D                    | WT    | WT    | WT     | WT    | WT                  | WT                 | WT   | WT   | WT    | WT   | D                  | WT  |  |

Abbreviations: M, truncating mutation; m, missense mutation; M/M or m/m, biallelic mutation; D, hemizygous deletion; D/D, homozygous deletion; ND, not determined

<sup>^</sup>This gene was also studied by FISH analysis. Data for SUDHL5, SUDHL6, SUDHL8, SUDHL10 and DB are from the Tumorscape database (<http://www.broadinstitute.org/tumorscape/pages/portalHome.jsf>)

\*Data from Garbati et al, Cancer Letter 2011
